# Supplementary material for: Unexpected Noncovalent Off-Target Activity of Clinical BTK Inhibitors Leads to Discovery of a Dual NUDT5/14 Antagonist
Source: PubMed Central journal article supplement (PMC11089510; doi:10.1021/acs.jmedchem.4c00072), 2024-04-18
Supplement: jm4c00072_si_001.pdf [file jm4c00072_si_001.pdf]

## Supporting Information

### Unexpected non-covalent off-target activity of clinical BTK inhibitors leads to discovery of a dual NUDT5/14 antagonist

Esra Balıkcı<sup>1,2†</sup>, Anne-Sophie M. C. Marques<sup>1,2†</sup>, Ludwig G. Bauer<sup>1,2†</sup>, Raina Seupel<sup>1,2</sup>, James Bennett<sup>1,2</sup>, Brigitt Raux<sup>1,2</sup>, Karly Buchan<sup>1,2</sup>, Klemensas Simelis<sup>1,2</sup>, Usha Singh<sup>1,2</sup>, Catherine Rogers<sup>1,2</sup>, Jennifer Ward<sup>1,2</sup>, Carol Cheng<sup>1,2</sup>, Tamas Szommer<sup>1,2</sup>, Kira Schuetzenhofer<sup>5</sup>, Jonathan M. Elkins<sup>1,2</sup>, David L. Sloman<sup>5</sup>, Ivan Ahel<sup>4</sup>, Oleg Fedorov<sup>1,2</sup>, Paul E. Brennan<sup>1,2,3</sup>, Kilian V. M. Huber<sup>1,2\*</sup>

<sup>1</sup>Centre for Medicines Discovery, Nuffield Department of Medicine, University of Oxford, Old Road Campus, Roosevelt Drive, Oxford OX3 7FZ, UK

<sup>2</sup>Target Discovery Institute, Nuffield Department of Medicine, University of Oxford, Old Road Campus, Roosevelt Drive, Oxford OX3 7FZ, UK

<sup>3</sup>Alzheimer's Research UK Oxford Drug Discovery Institute, Nuffield Department of Medicine, University of Oxford, Old Road Campus, Roosevelt Drive, Oxford OX3 7FZ, UK

<sup>4</sup>Sir William Dunn School of Pathology, University of Oxford, South Parks Road, Oxford OX1 3RE, UK

<sup>5</sup>Departments of Discovery Chemistry, Merck & Co. Inc., 33 Avenue Louis Pasteur, Boston, Massachusetts 02115, United States

<sup>†</sup>These authors contributed equally to this work

\*Correspondence:

kilian.huber@cmd.ox.ac.uk

## Table of Contents

|                                                                                                            |        |
|------------------------------------------------------------------------------------------------------------|--------|
| <b>Supplementary Figures</b> .....                                                                         | S3     |
| <b>Figure S1.</b> Chemical proteomics results.....                                                         | S3     |
| <b>Figure S2.</b> NUDT5 NanoBRET TE assay.....                                                             | S4     |
| <b>Figure S3.</b> Mass spectrometry analysis of ibrutinib analogues with NUDT5.....                        | S5-7   |
| <b>Figure S4.</b> Mass spectrometry analysis of ibrutinib analogues with NUDT14.....                       | S8-10  |
| <b>Figure S5.</b> Multiple sequence alignment of NUDT14 and NUDT5.....                                     | S11    |
| <b>Table S1.</b> NUDIX selectivity for compound <b>9</b> and ibrutinib ( <b>1</b> ) determined by SPR..... | S11    |
| <b>Figure S6.</b> Setup of HiBiT-NUDT14 CETSA.....                                                         | S12    |
| <b>Figure S7.</b> Assessment of protein ADP-ribosylation.....                                              | S12    |
| <b>NMR spectra and LC-MS chromatograms</b> .....                                                           | S13-43 |
| <b>Table S2.</b> X-ray data collection and refinement statistics.....                                      | S44    |
| <b>Table S3.</b> Primers for cloning.....                                                                  | S45    |

## Supplementary Figures

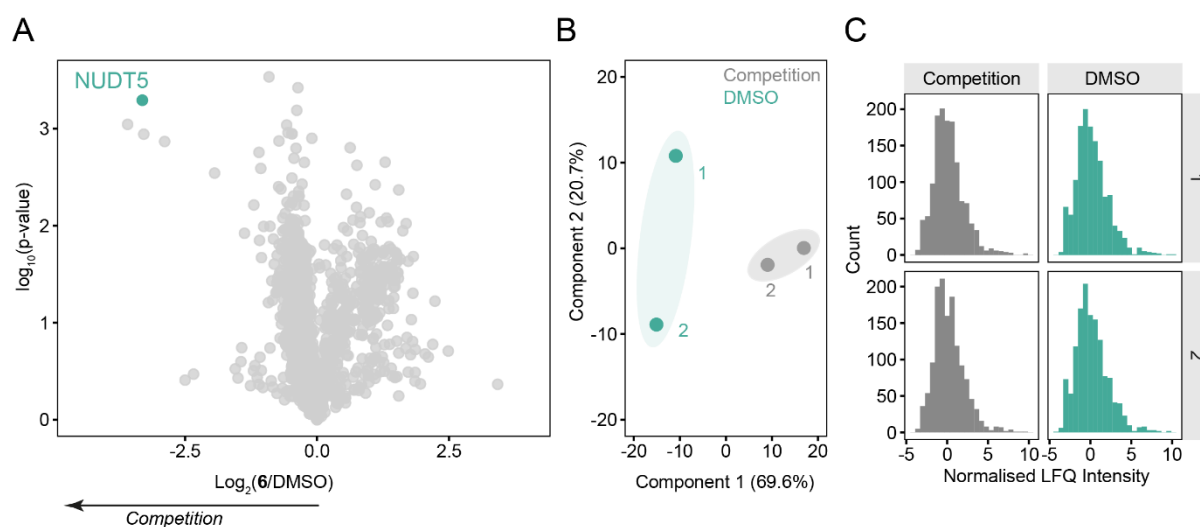

**Figure S1.** Evaluation of **6** by compound centric chemical proteomics using CBH-003 (**7**) affinity matrix enables enrichment of endogenous NUDT5 from cellular lysates. Target proteins are pulled down from lysates and analysed by LC-MS/MS. (A) Chemoproteomic result shows NUDT5 as significantly enriched and competed by 20  $\mu\text{M}$  of **6** ( $n = 2$ ). (B) Principal component analysis and (C) histograms of measured pull-down samples show clustering of DMSO or competition conditions and uniform distribution of quantified proteins respectively confirming method robustness.

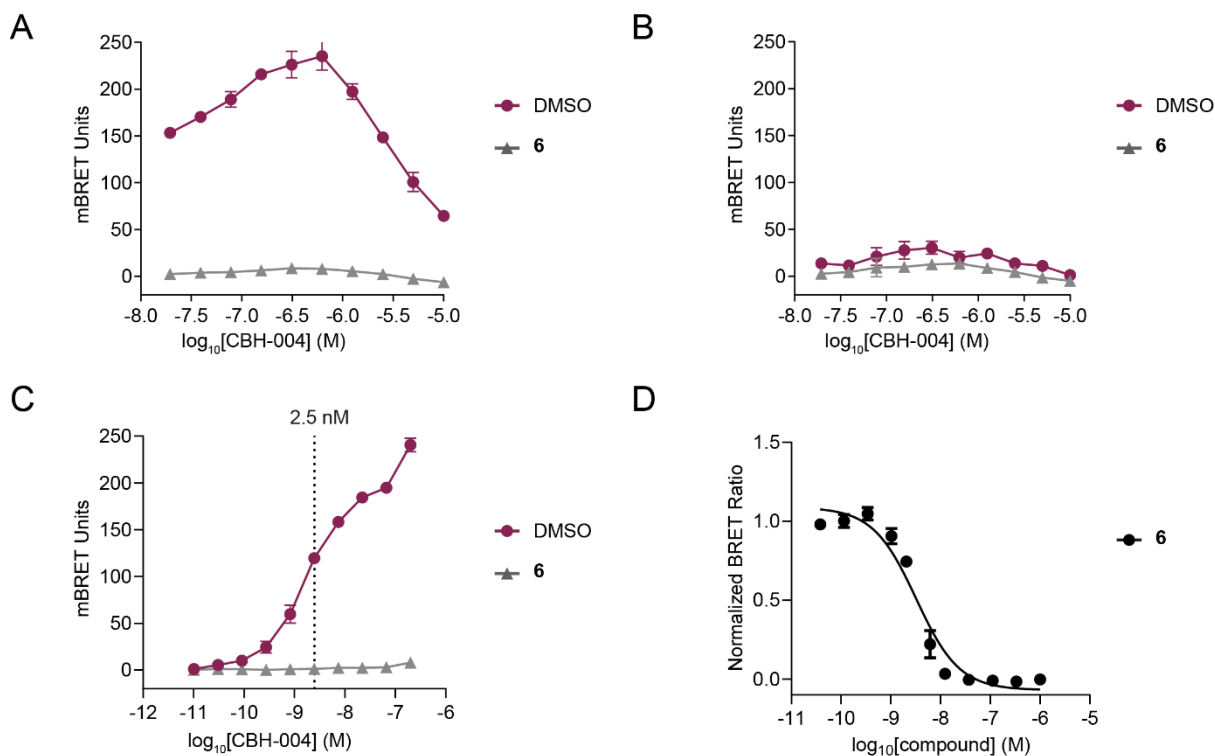

**Figure S2.** NUDT5 NanoBRET TE assay setup with CBH-004 (**8**) and overexpressed NanoLuc-NUDT5 in HEK293 cells. (A) Titration of **8** +/- 10  $\mu$ M of **6** in HEK cells with overexpressed N-terminal NanoLuc-NUDT5 or (B) C-terminal NanoLuc-NUDT5. (C) Final compound **8** titration with N-terminal NanoLuc-NUDT5 to determine tracer concentration for optimal assay window. (D) Dose-dependent competition with **6** using 2.5 nM of **8**. Data are shown as mean  $\pm$  SD and are based on three technical replicates. Graph is representative of two independent biological replicates ( $n = 2$ ) ( $EC_{50} = 0.004 \pm 0.001 \mu$ M).

### Compound 1

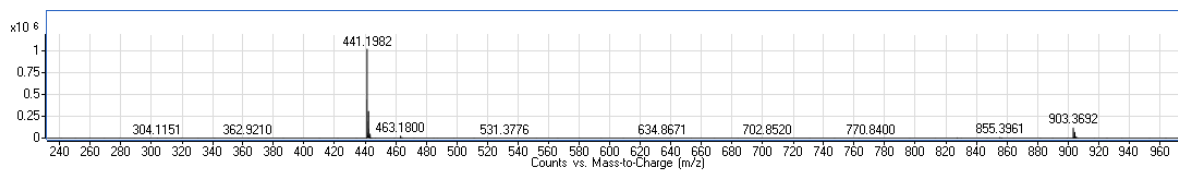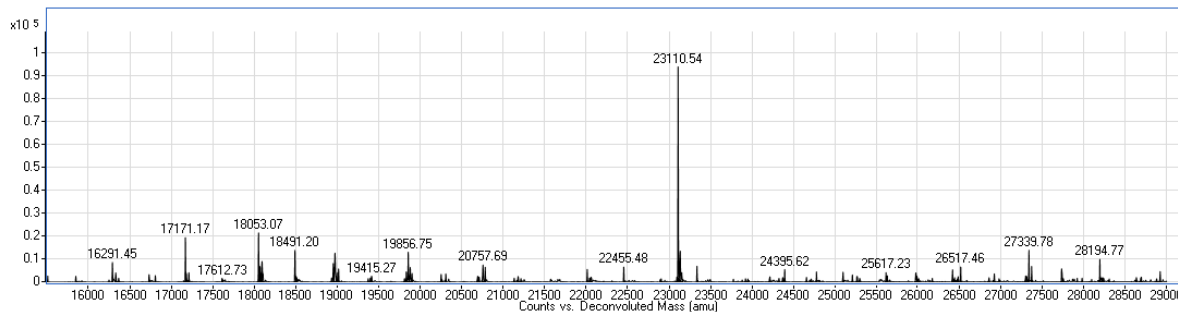

### Compound 9

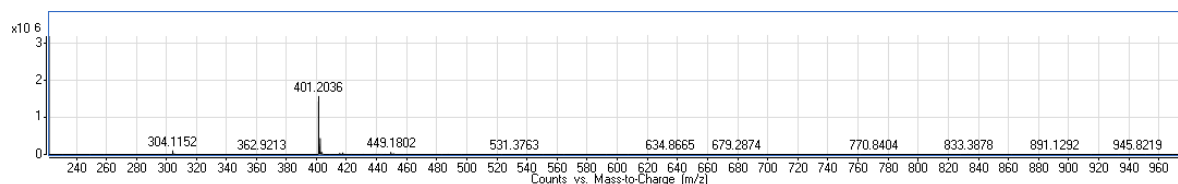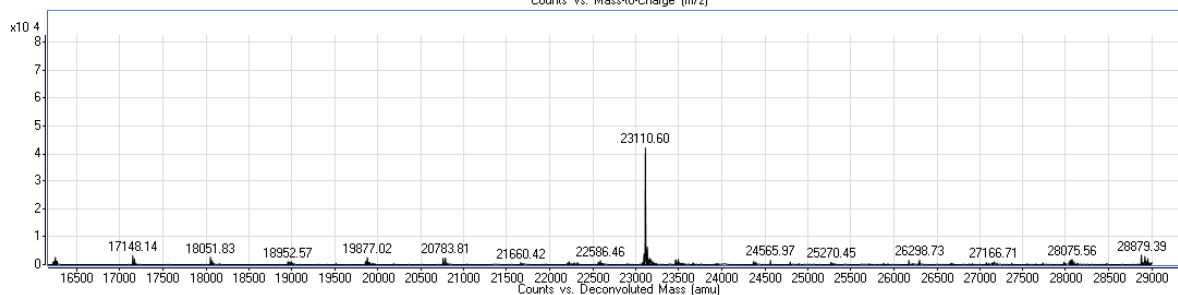

### Compound 10

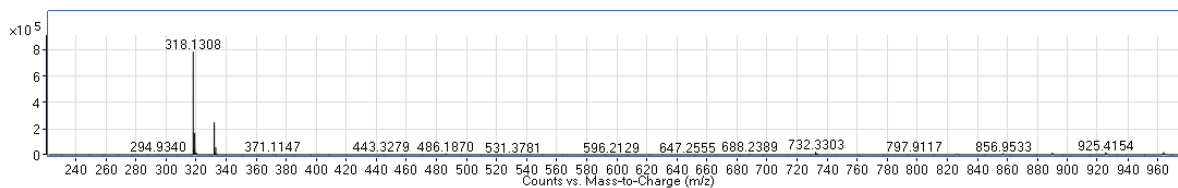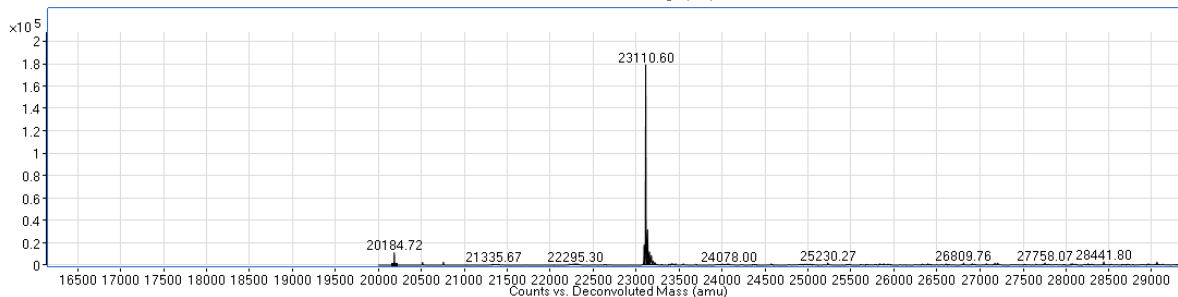

### Compound 11

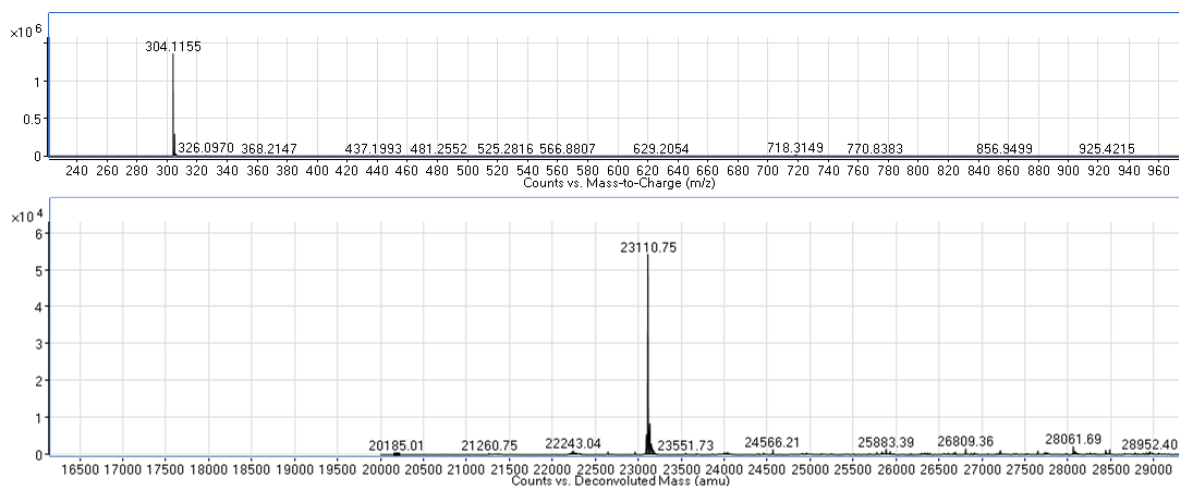

### Compound 12

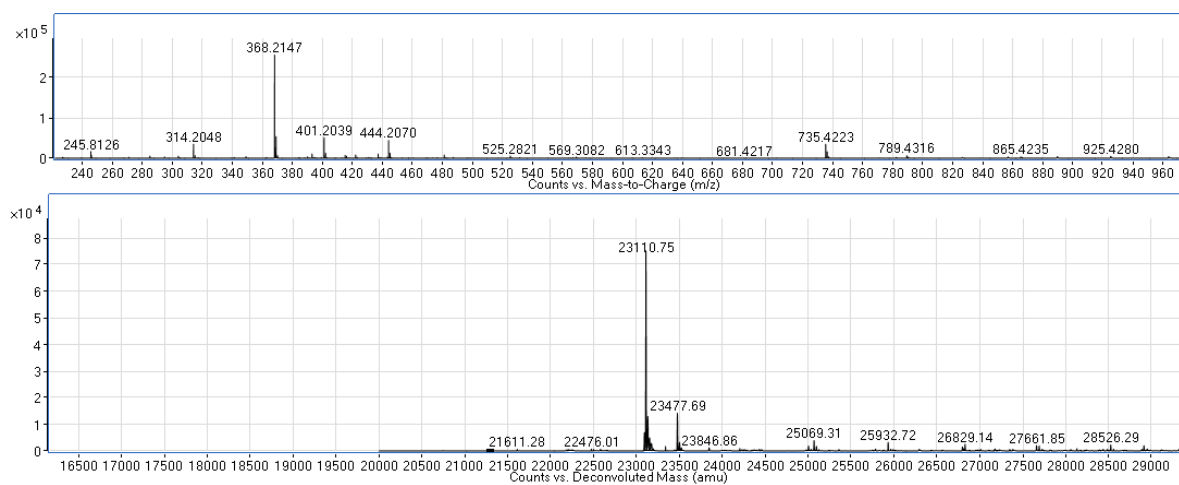

### Compound 13

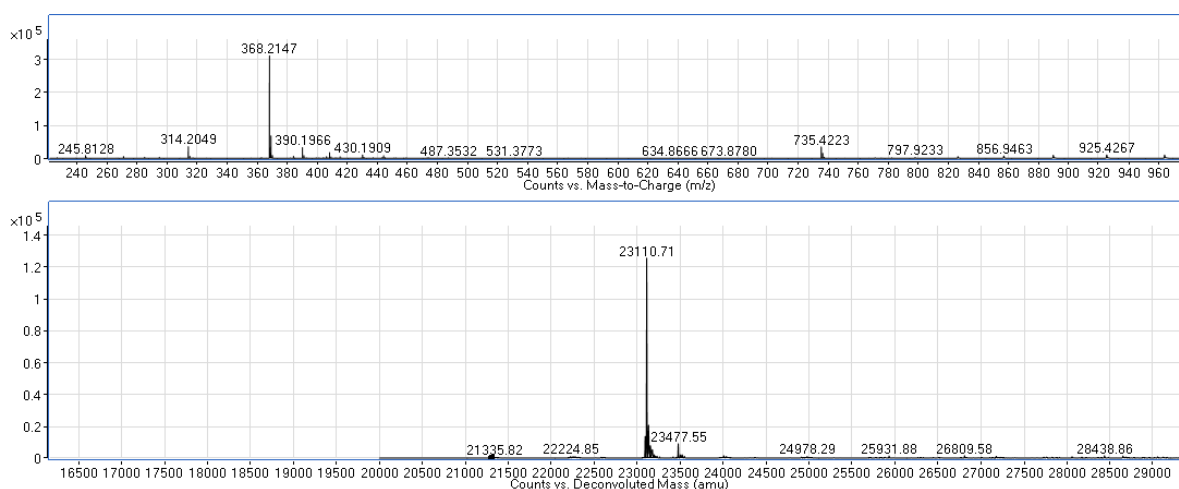

### Compound 14

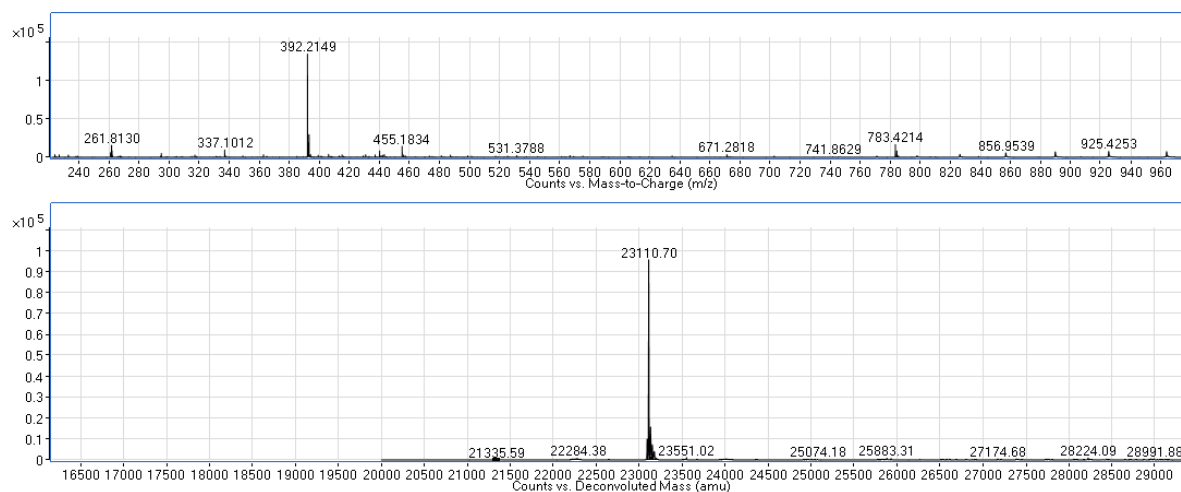

### Compound 15

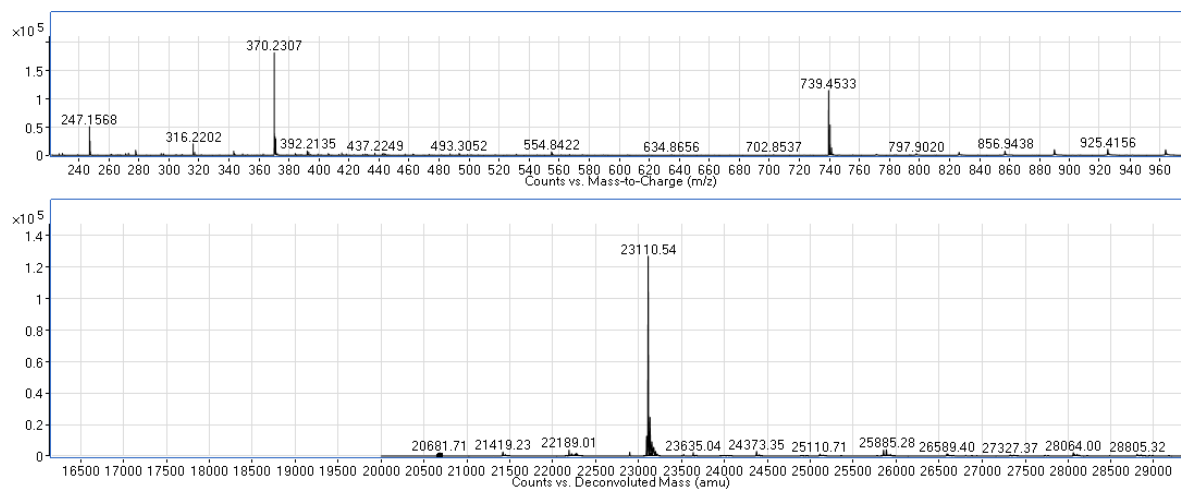

**Figure S3.** Intact protein mass spectra of NUDT5 with ibrutinib (**1**) and ibrutinib analogues (**9-15**) after 2 h incubation. (The corresponding compounds mass spectra are included for each molecule, NUDT5 molecular weight corresponds to 23110 Da).

### Compound 1

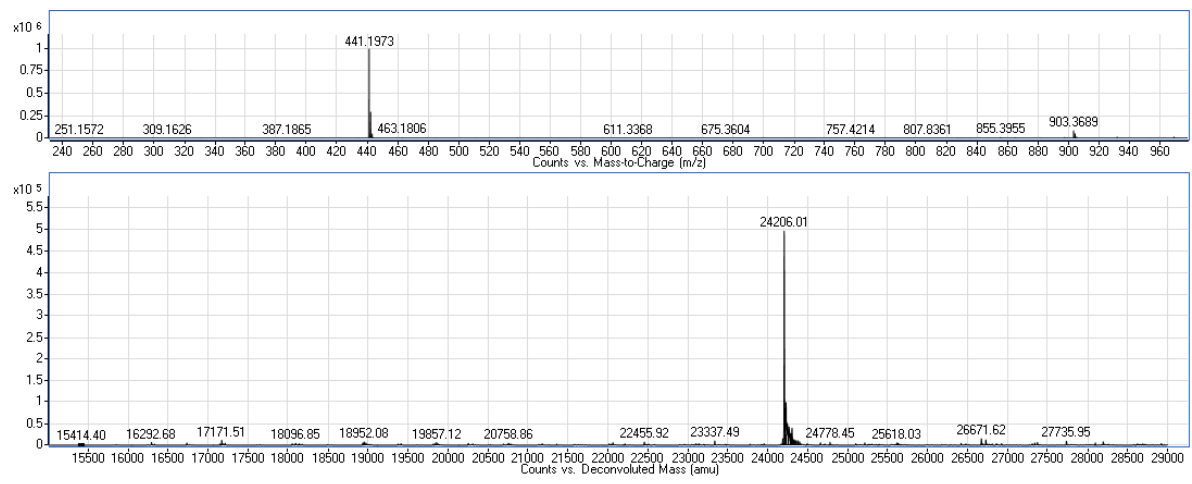

### Compound 9

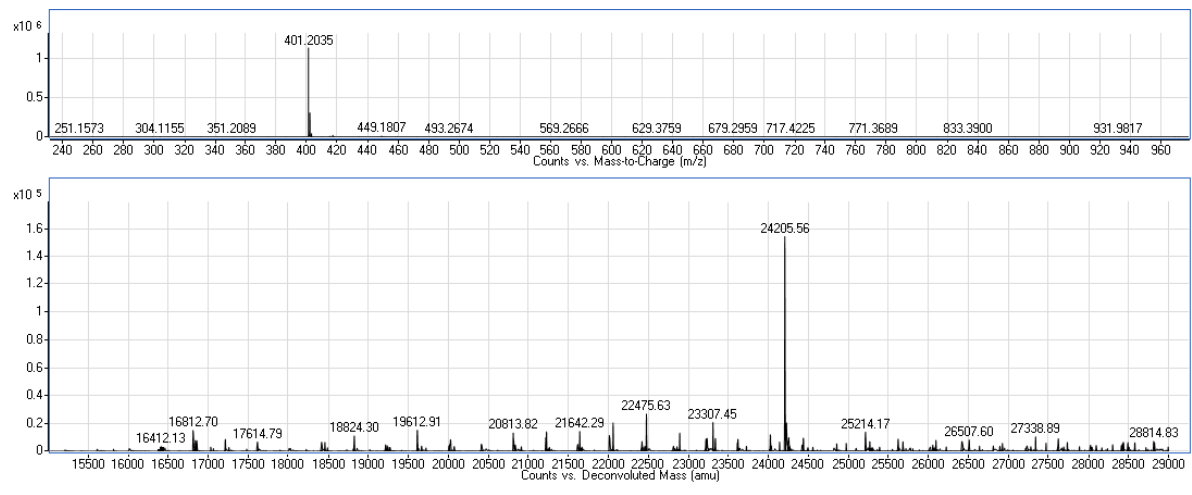

### Compound 10

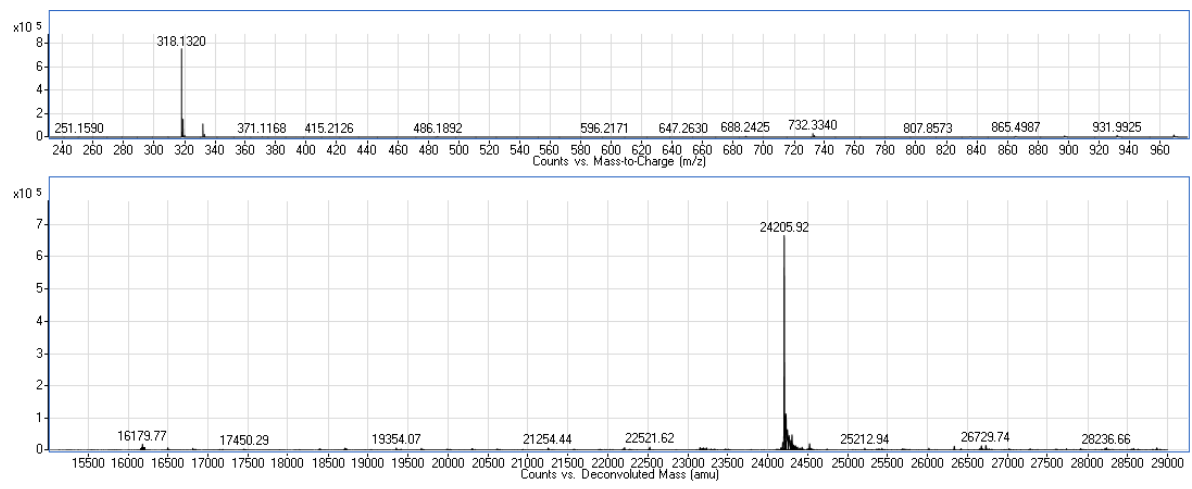



### Compound 11

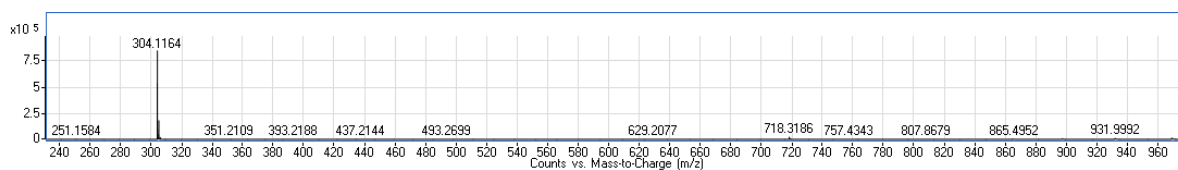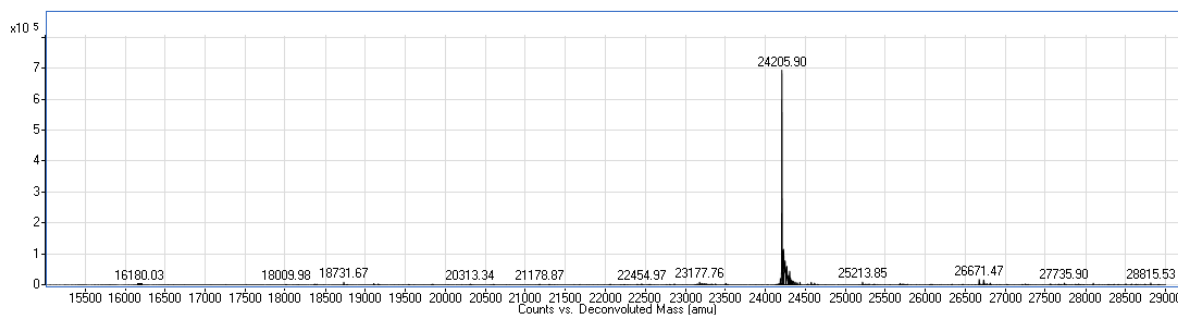

### Compound 12

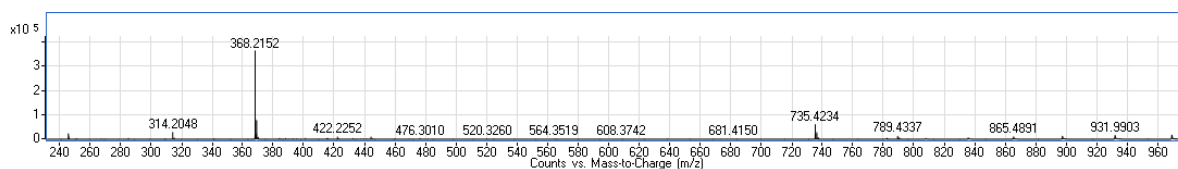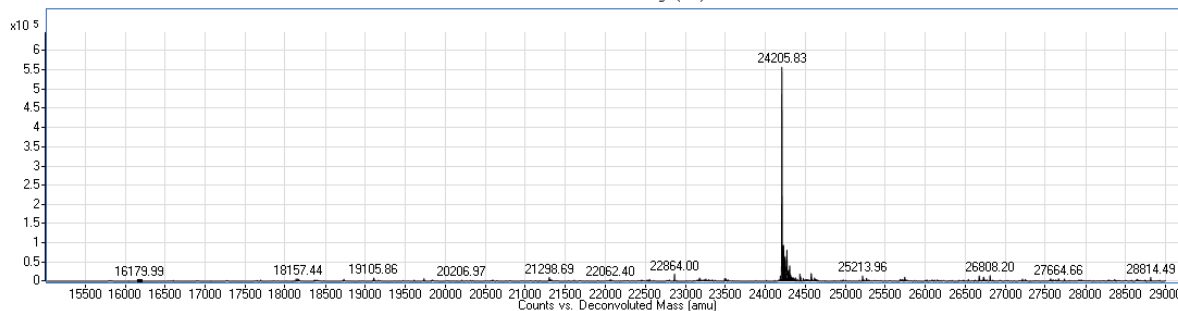

### Compound 13

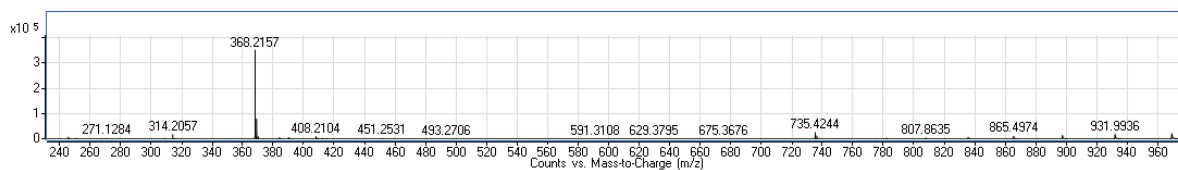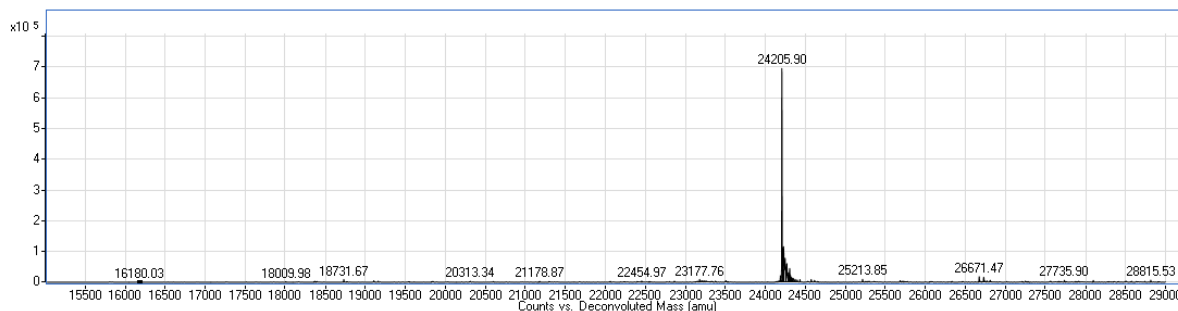

## Compound 14

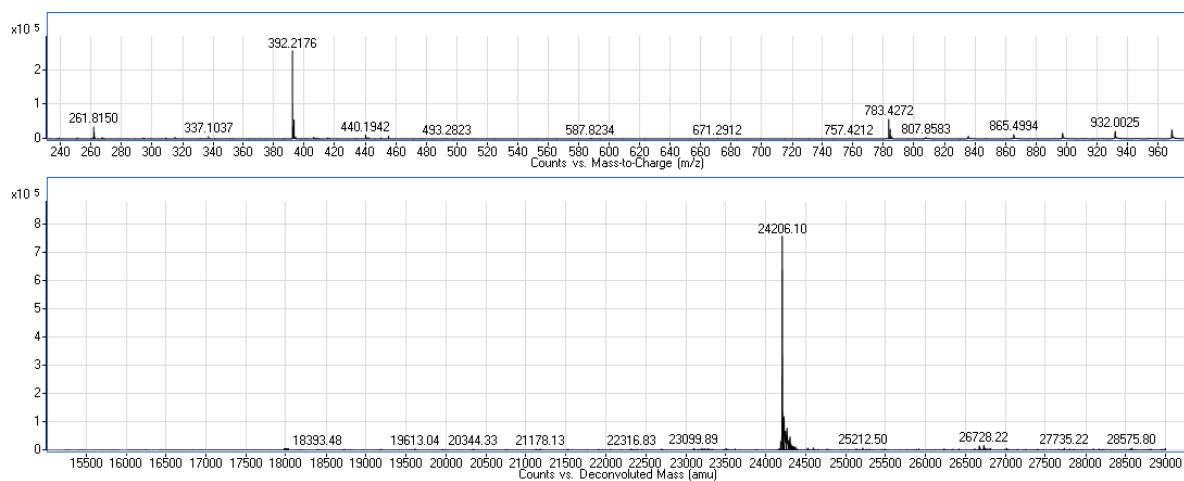

## Compound 15

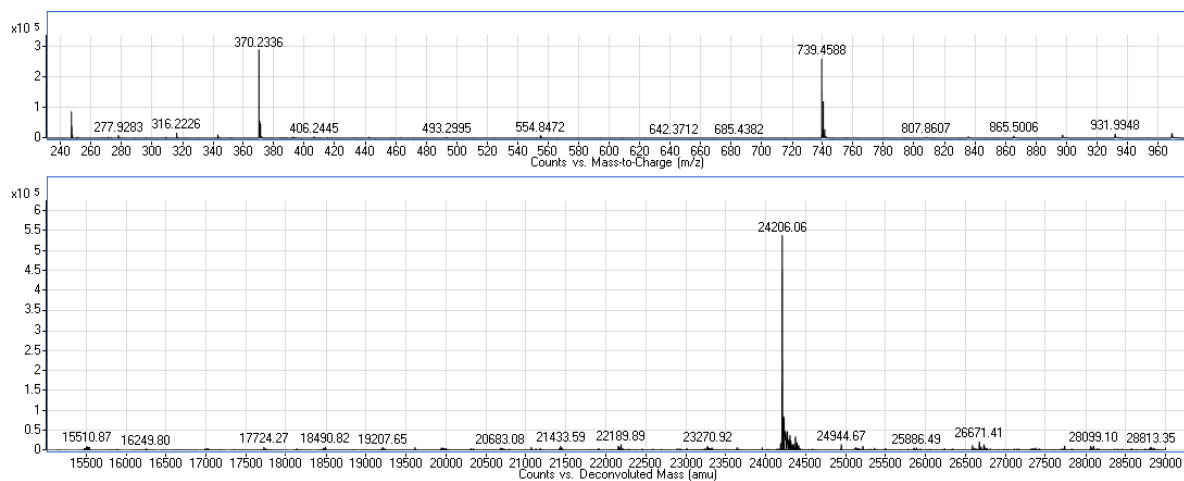

**Figure S4.** Intact protein mass spectra of NUDT14 with ibrutinib (**1**) and ibrutinib analogues (**9-15**) after 2 h incubation. (The corresponding compounds mass spectra are included for each molecule, NUDT14 molecular weight corresponds to 24206 Da).

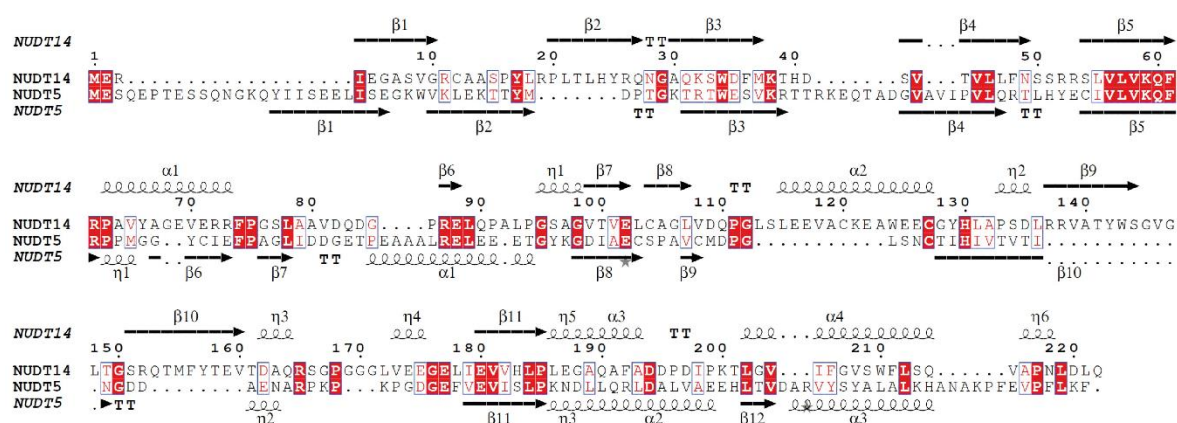

**Figure S5.** Multiple sequence alignment of NUDT14 and NUDT5 (Clustal Omega). Identical sequences are highlighted in red while similar residues are in red letters with blue squares.

**Table S1:** NUDIX selectivity for compound **9** and ibrutinib (**1**) determined by SPR. NB, no binding ( $K_D > 100 \mu\text{M}$ ). Data are shown as mean  $\pm$  SD and are based on two independent biological replicates ( $n = 2$ ).

| NUDIX protein | compound $K_D$ ( $\mu\text{M}$ ), (n=2) |                   |
|---------------|-----------------------------------------|-------------------|
|               | <b>1</b>                                | <b>9</b>          |
| NUDT14        | 1.90 $\pm$ 0.50                         | 0.368 $\pm$ 0.020 |
| NUDT5         | 0.209 $\pm$ 0.062                       | 0.237 $\pm$ 0.081 |
| NUDT1         | 3.50 $\pm$ 0.28                         | NB                |
| NUDT15        | NB                                      | NB                |
| NUDT7         | NB                                      | NB                |
| NUDT18        | NB                                      | NB                |
| NUDT12        | NB                                      | NB                |
| NUDT9         | NB                                      | NB                |
| NUDT21        | NB                                      | NB                |
| NUDT17        | NB                                      | NB                |
| NUDT16        | NB                                      | NB                |
| NUDT16L1      | NB                                      | NB                |

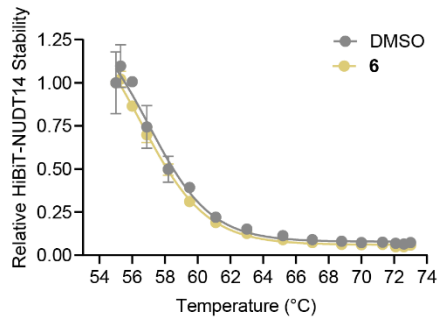

**Figure S6.** HiBIT-NUDT14 CETSA. The specific NUDT5 inhibitor **6** does not stabilise NUDT14 compared to DMSO. Graph is representative of two independent experiments (n = 2).

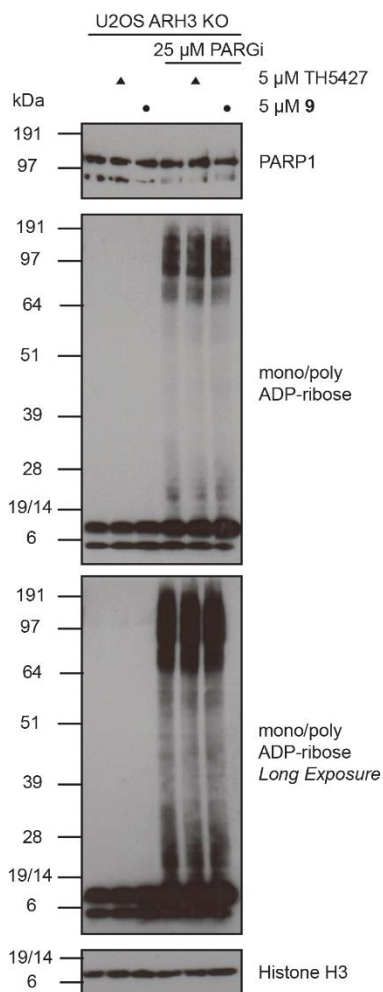

**Figure S7.** Assessment of protein ADP-ribosylation. Treatment of human cells with the inhibitors does not lead to changes in protein ADP-ribosylation. U2OS ARH3 KO cells were treated with the indicated inhibitors or DMSO for 3 days. ADPr levels were analysed using Western blotting.

## NMR Spectra and LC-MS chromatograms

### 3-bromo-1-(1-methylpiperidin-4-yl)-1H-pyrazolo[3,4-d]pyrimidin-4-amine (17a)

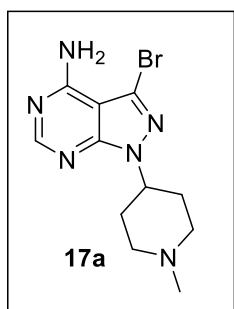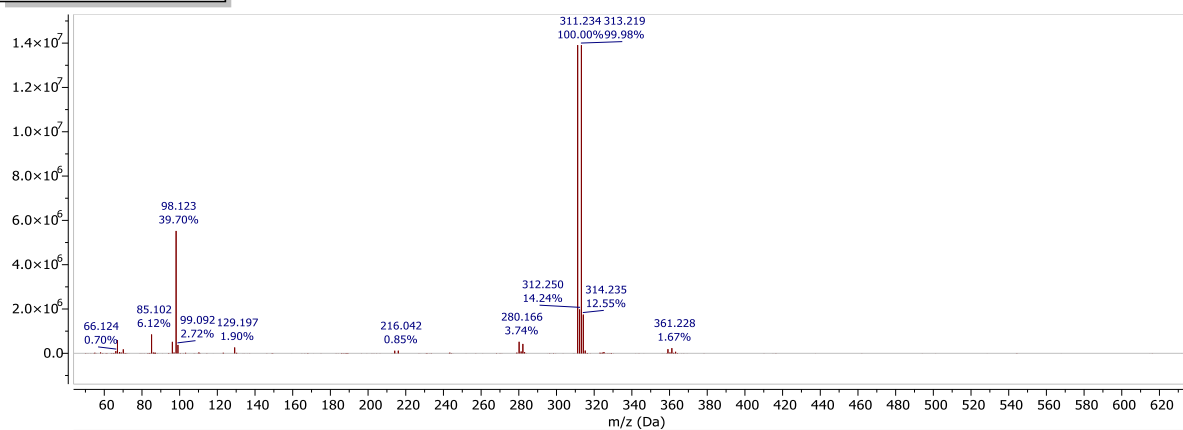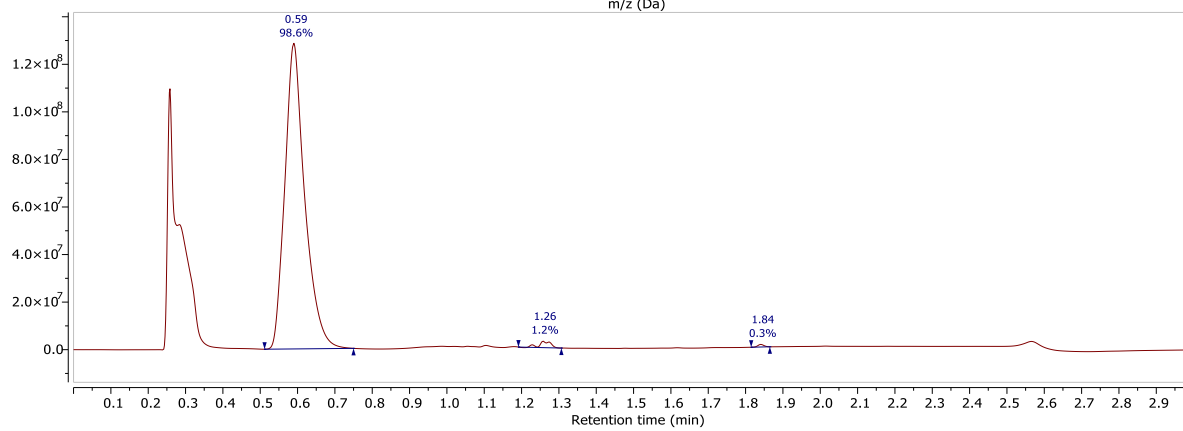

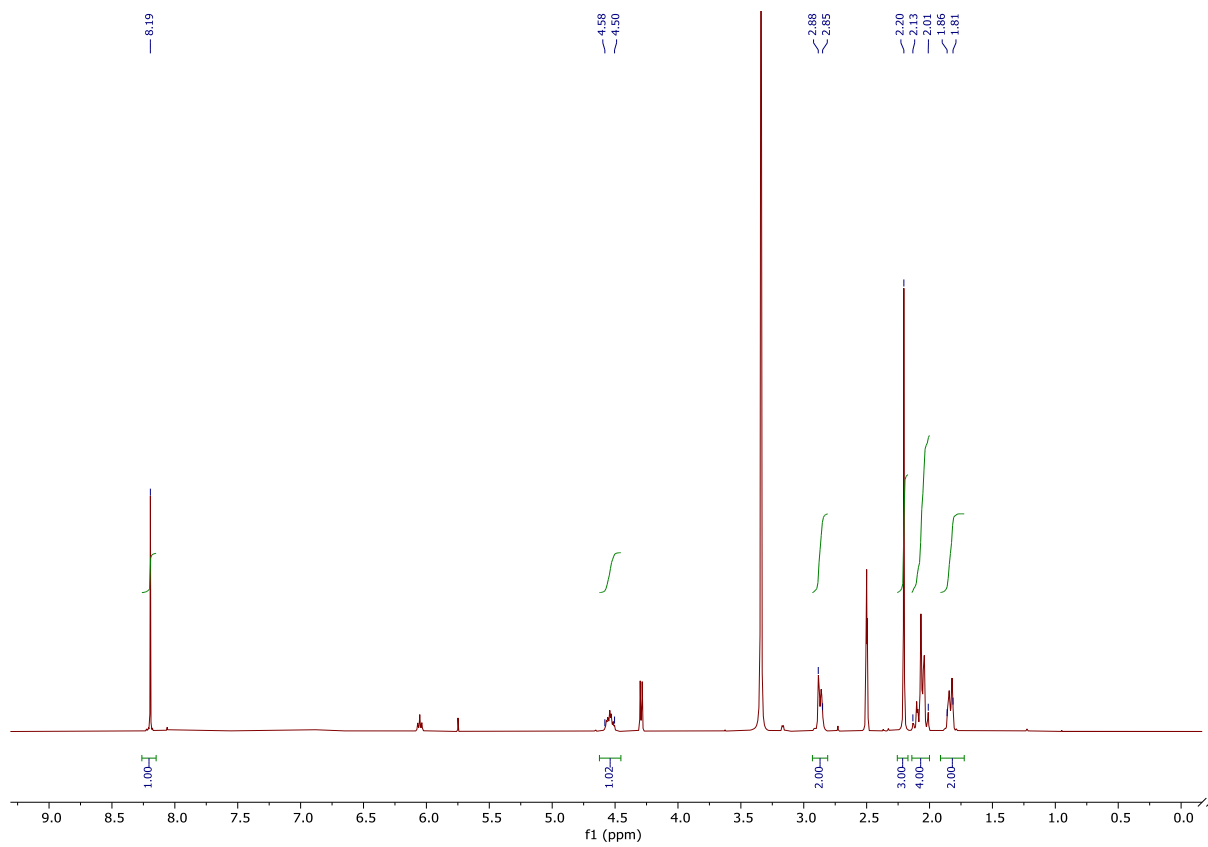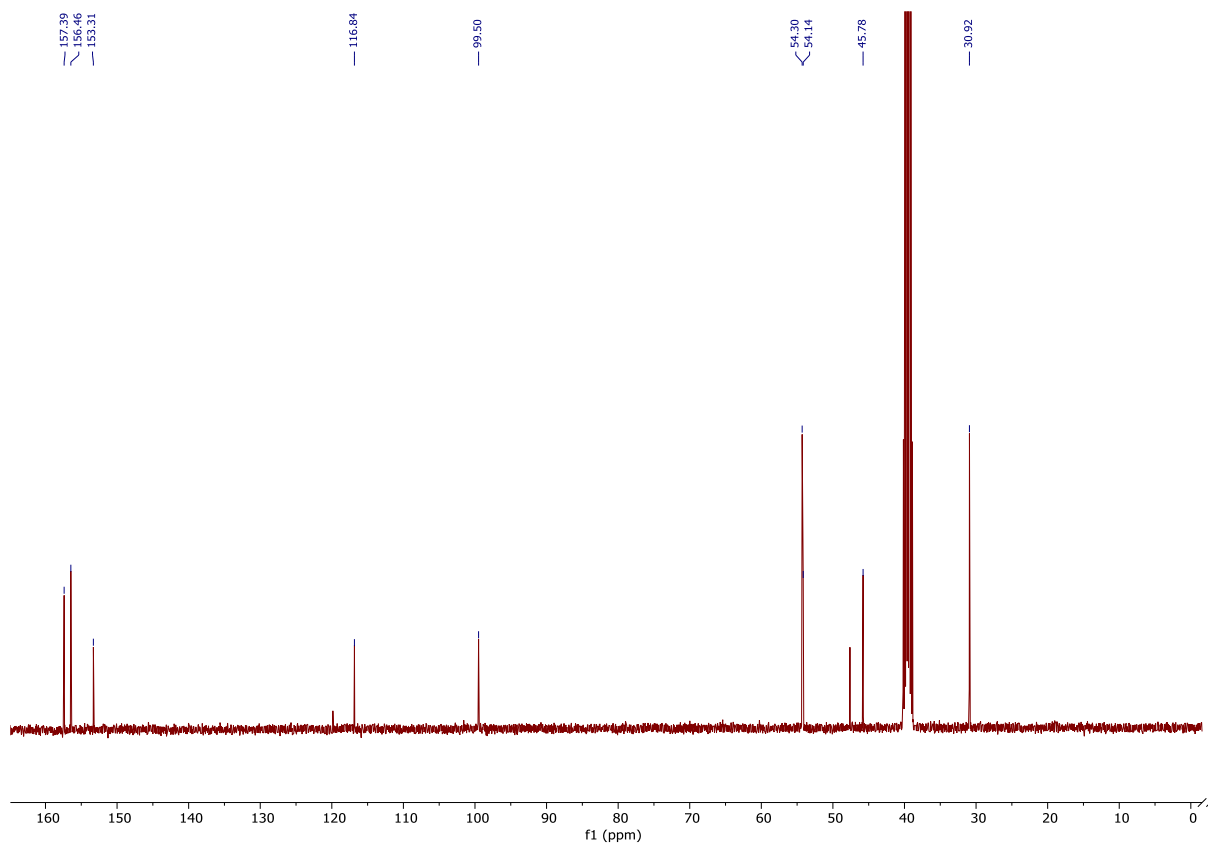

1-(1-methylpiperidin-4-yl)-3-(4-phenoxyphenyl)-1H-pyrazolo[3,4-d]pyrimidin-4-amine (9)

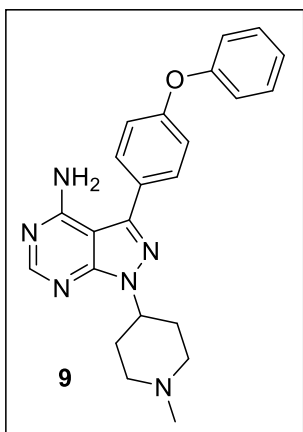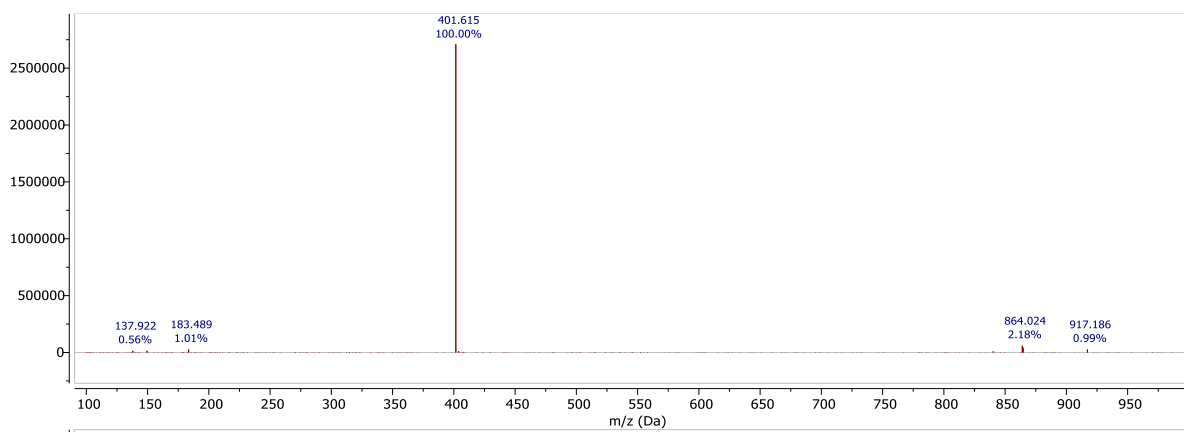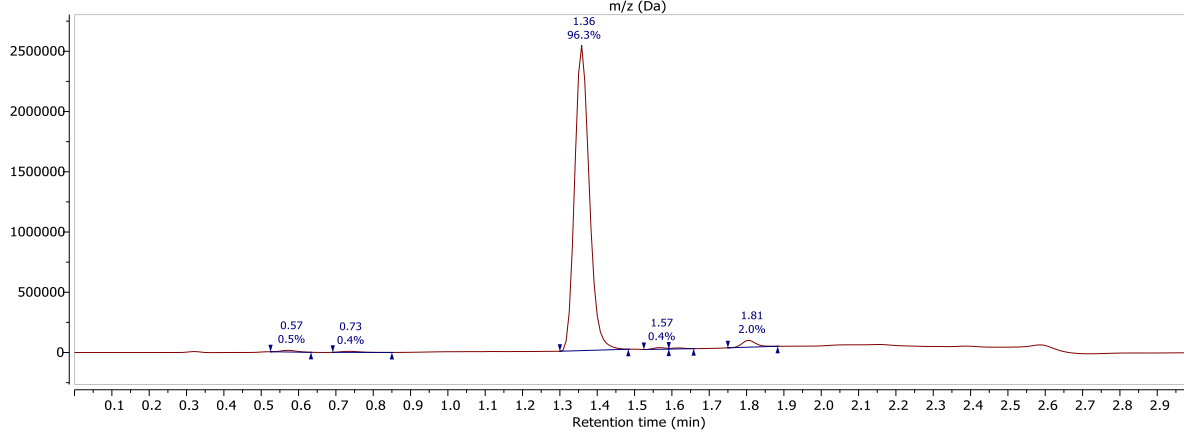

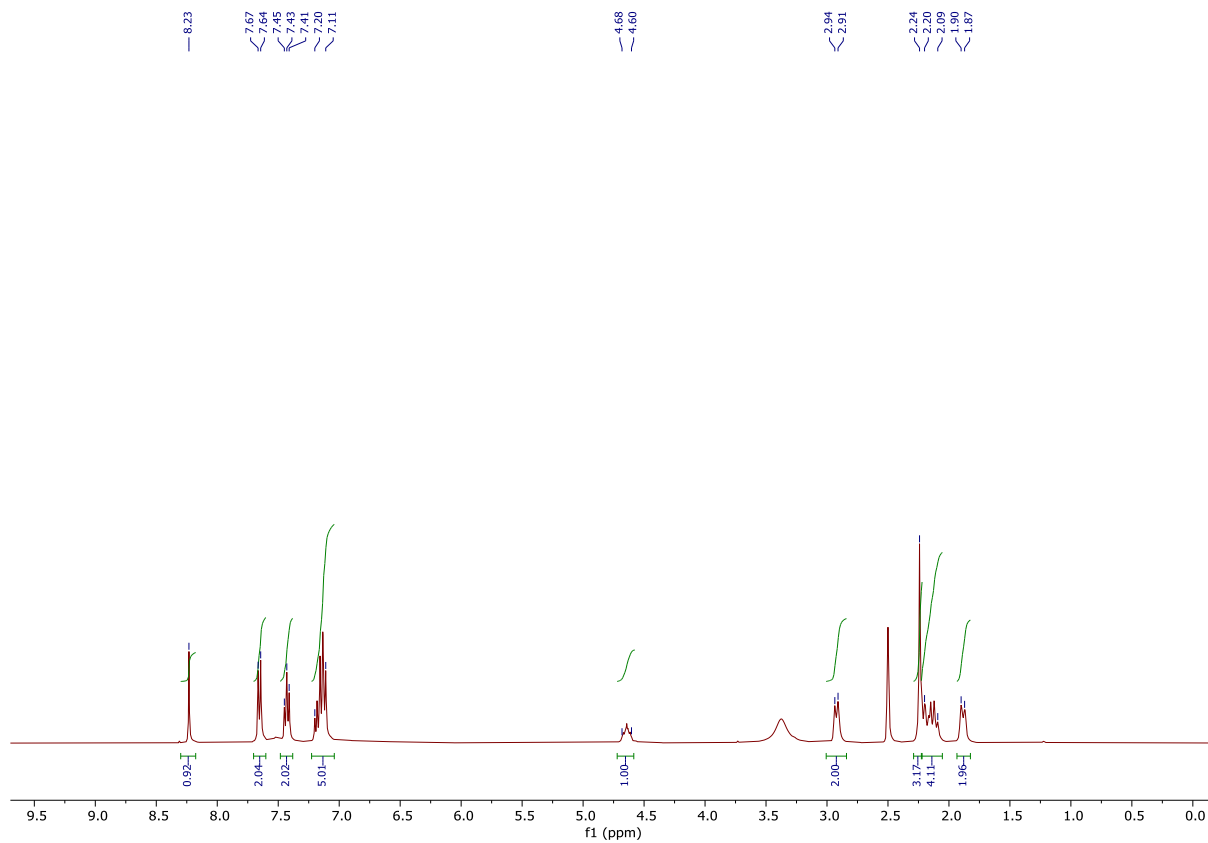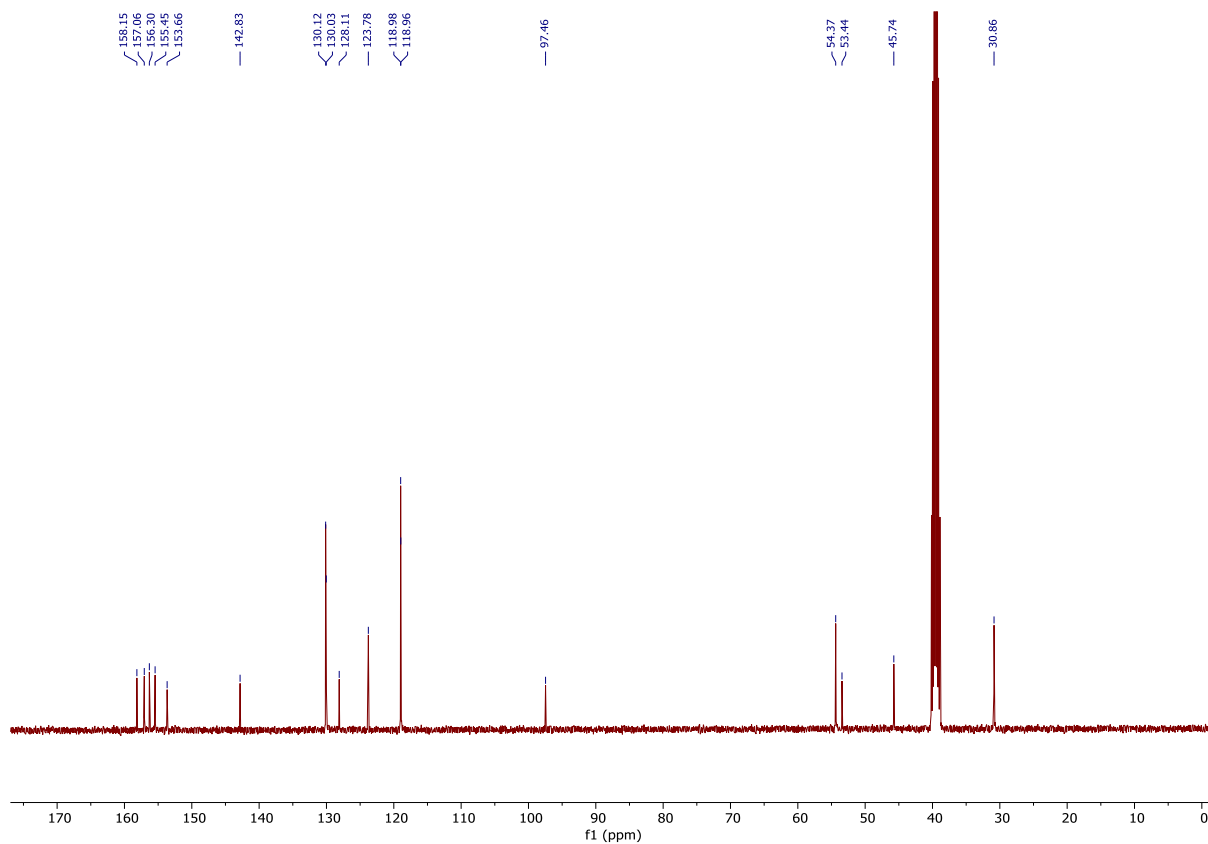



# 1-methyl-3-(4-phenoxyphenyl)-1H-pyrazolo[3,4-d]pyrimidin-4-amine (10)

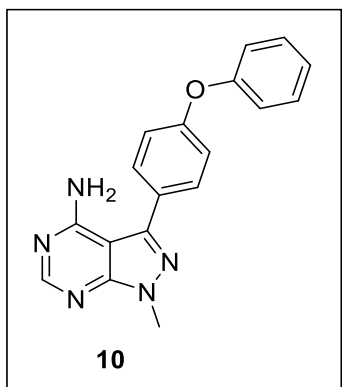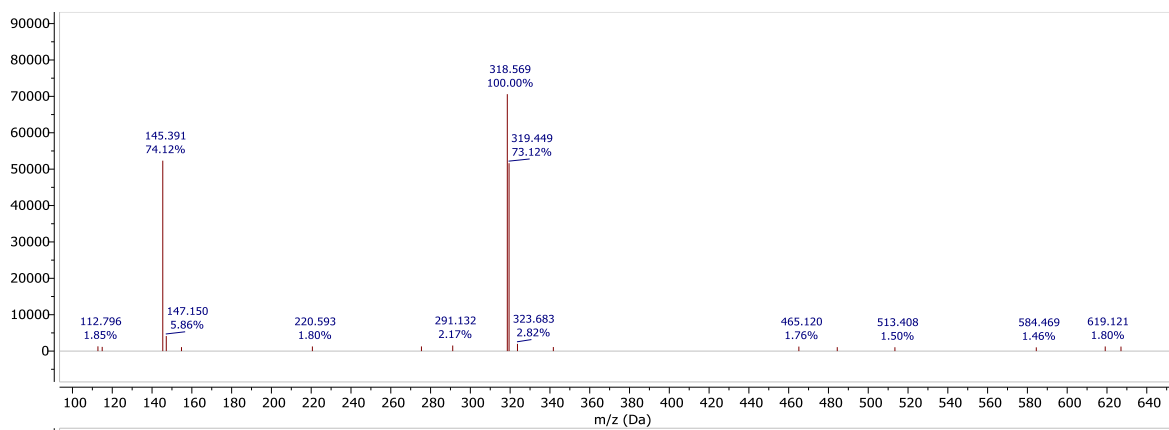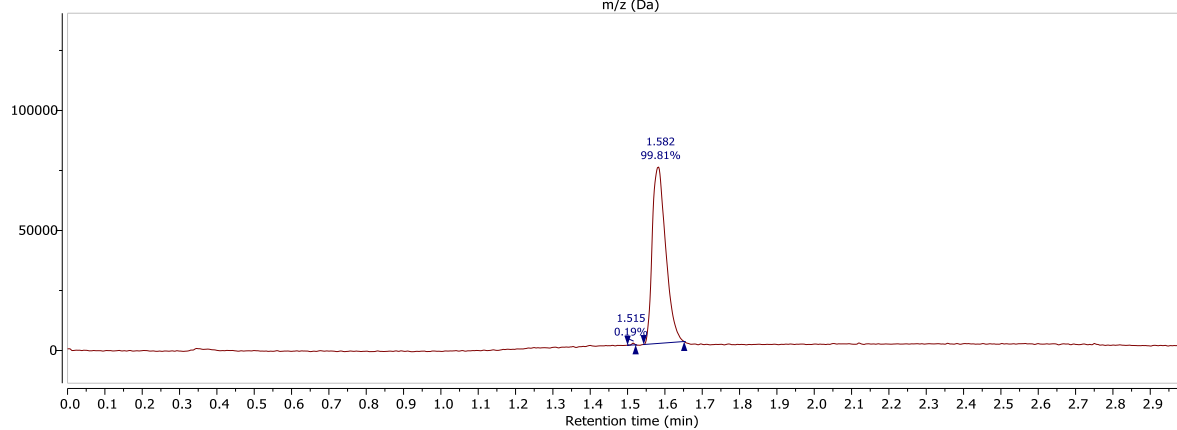

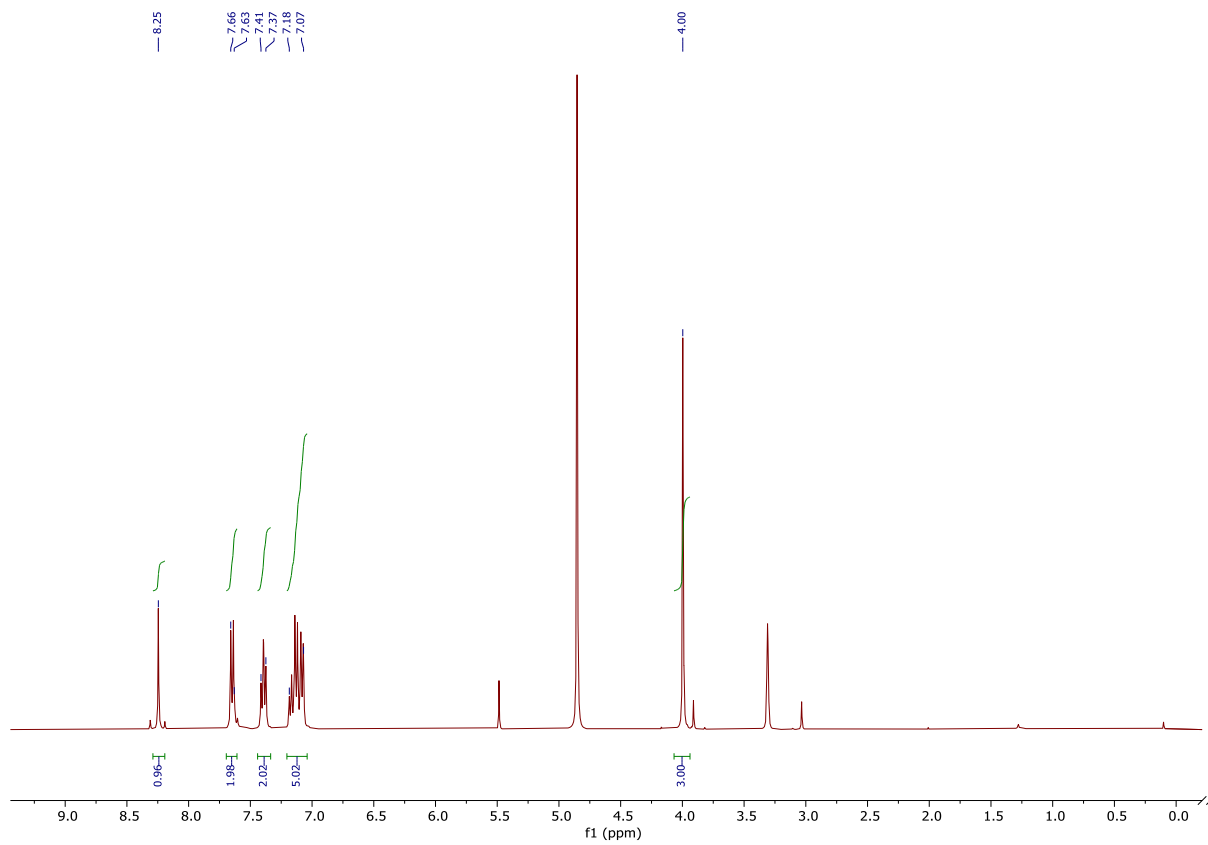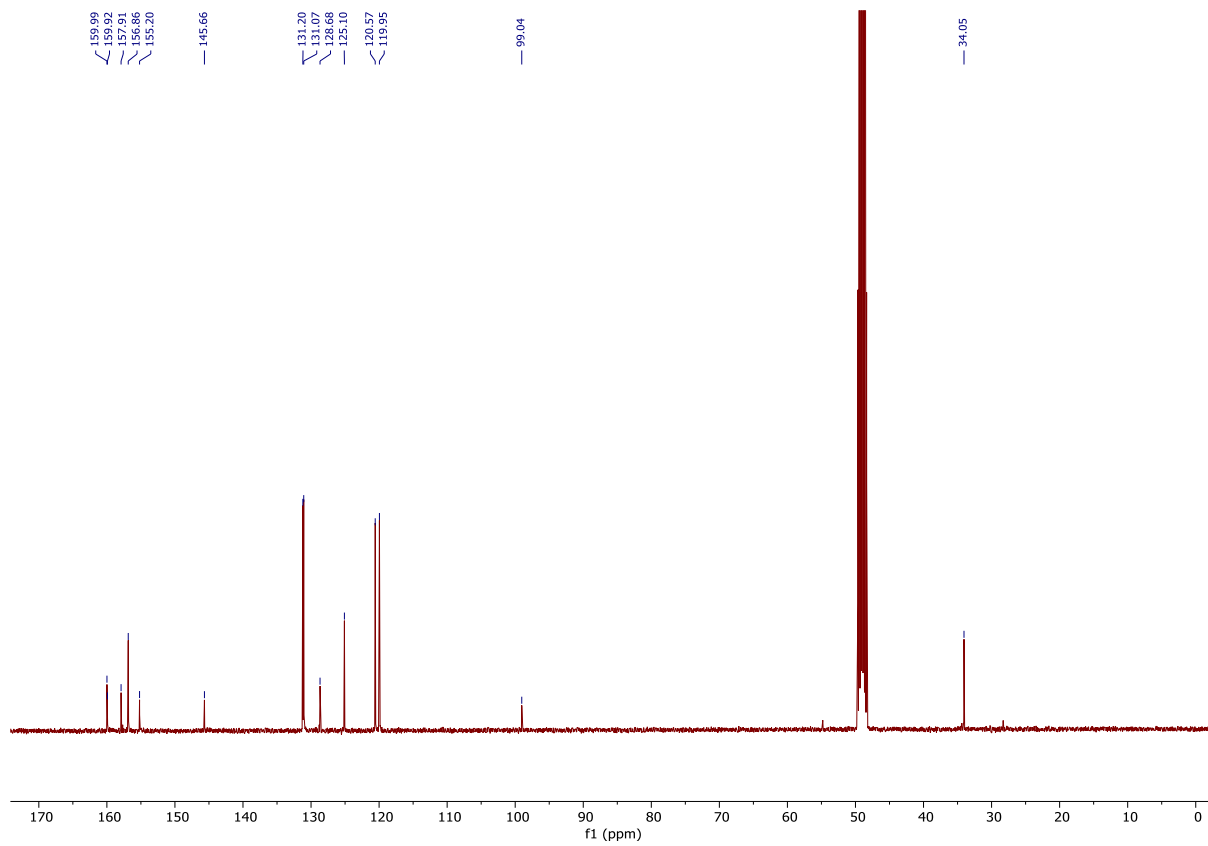

### 3-(4-phenoxyphenyl)-1H-pyrazolo[3,4-d]pyrimidin-4-amine (11)

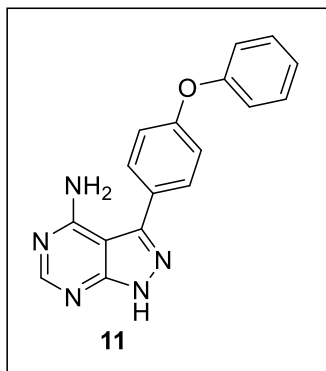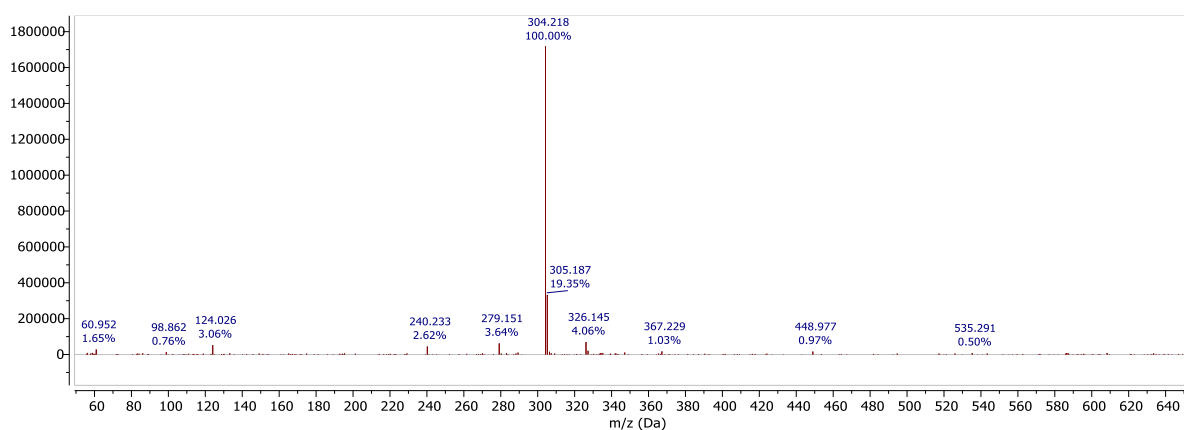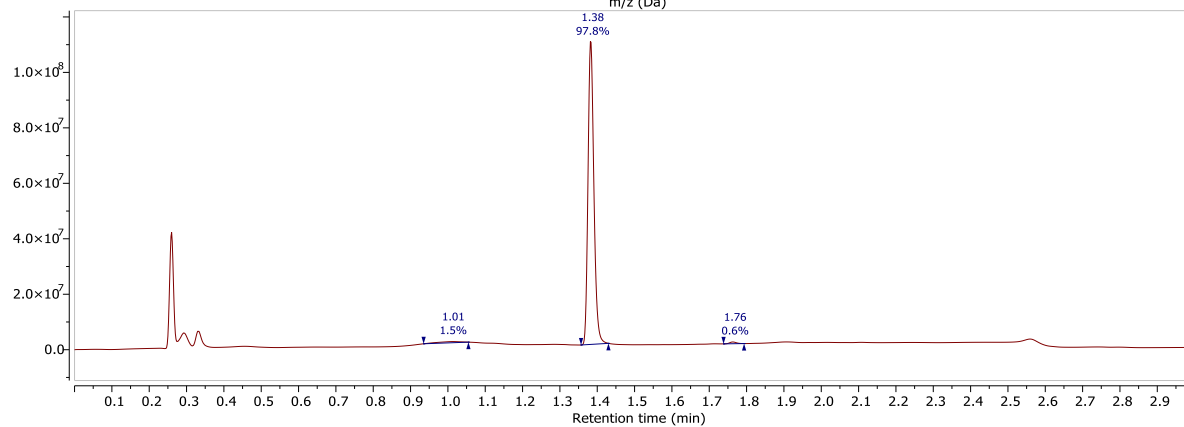

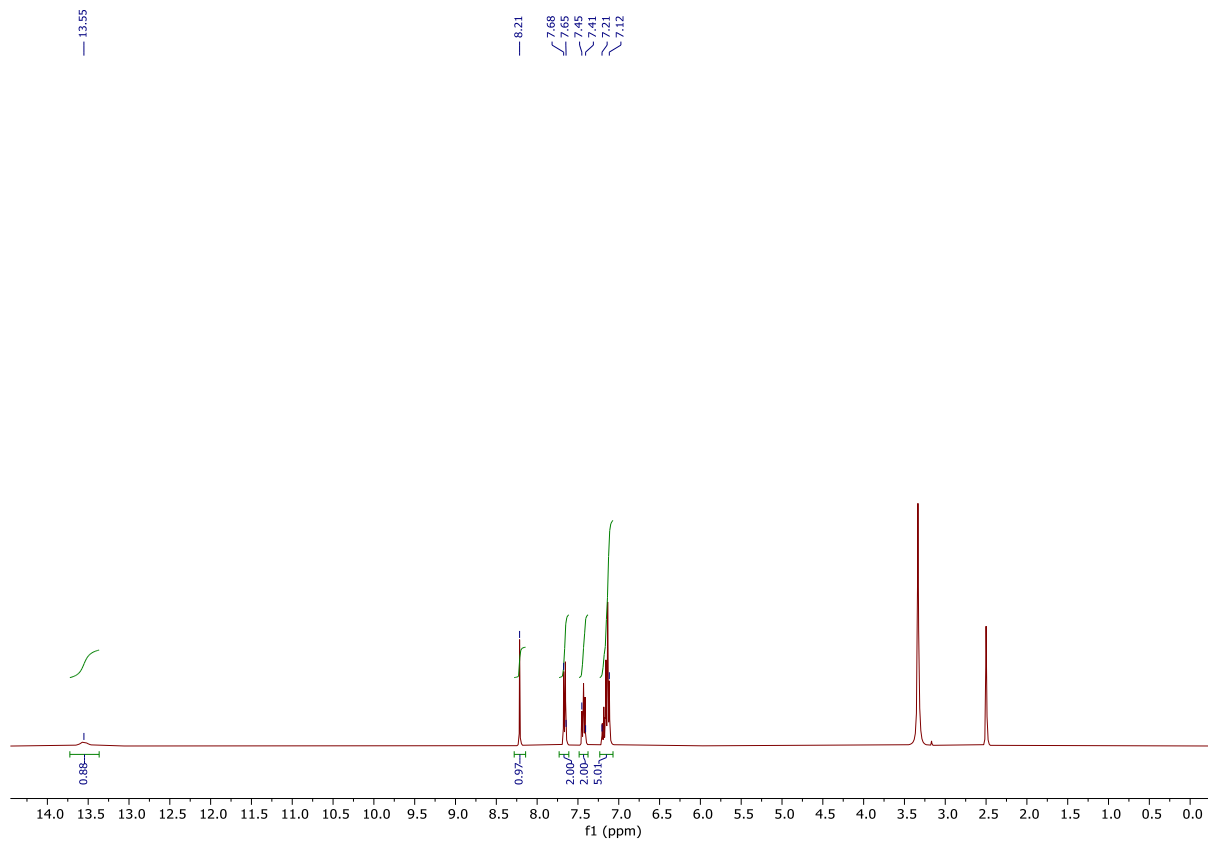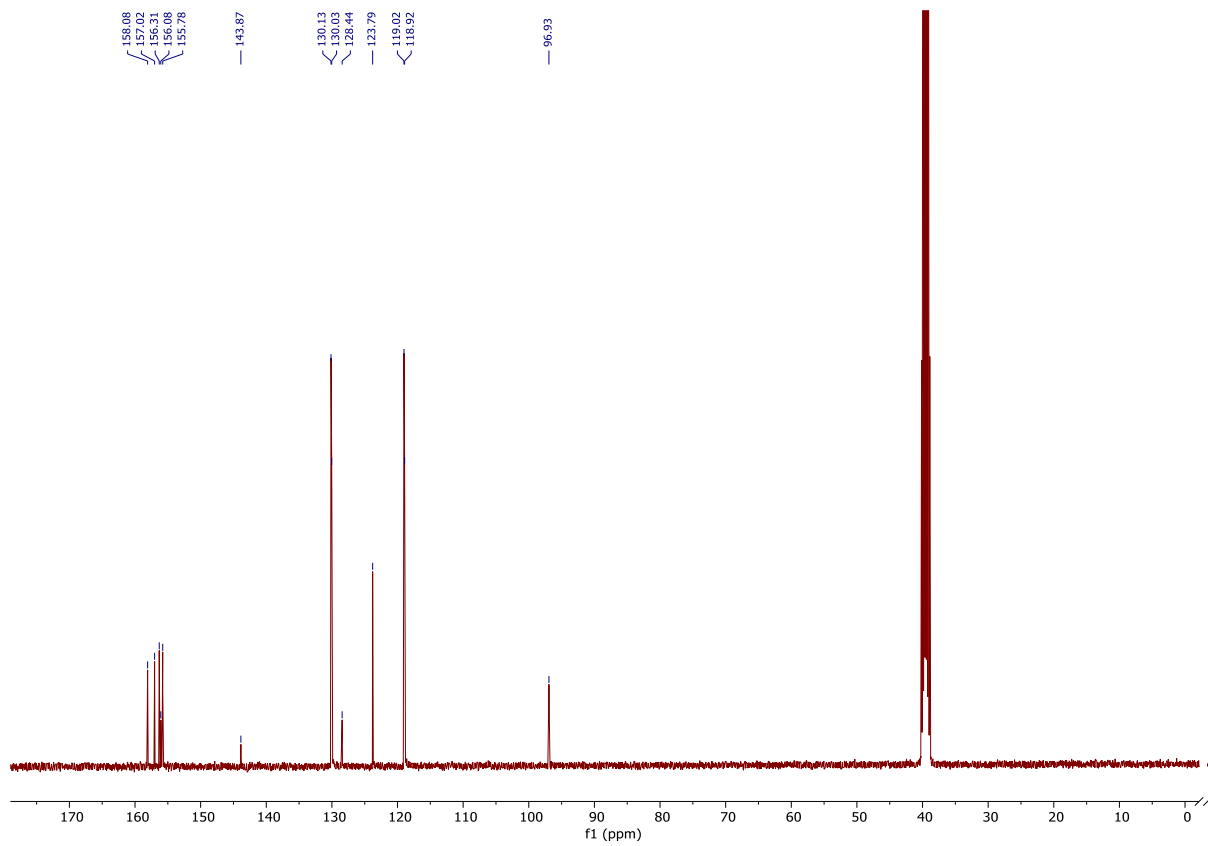

**Tert-butyl 4-(4-amino-1-(1-methylpiperidin-4-yl)-1H-pyrazolo[3,4-d]pyrimidin-3-yl)-3,6-dihydropyridine-1(2H)-carboxylate (18a)**

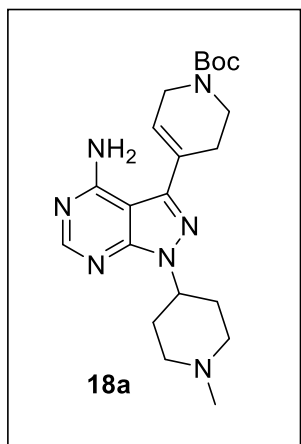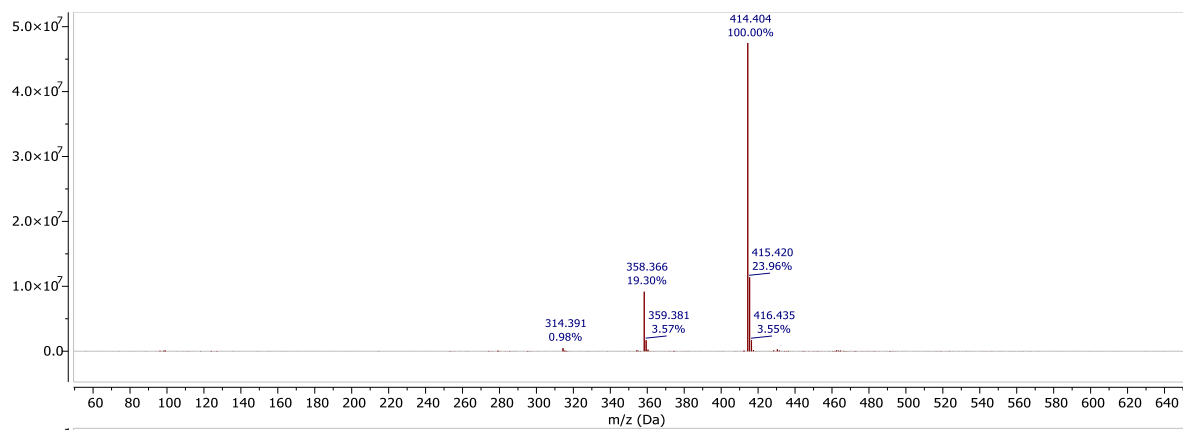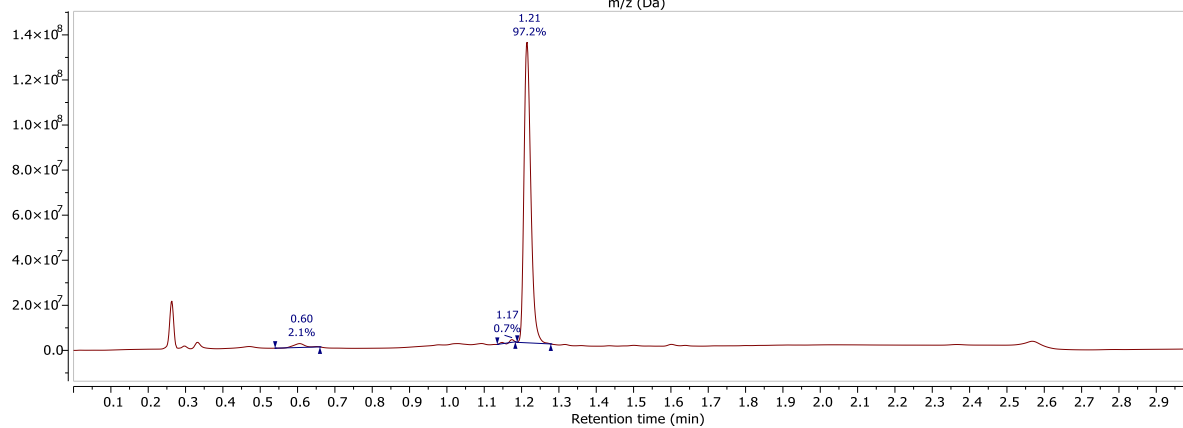

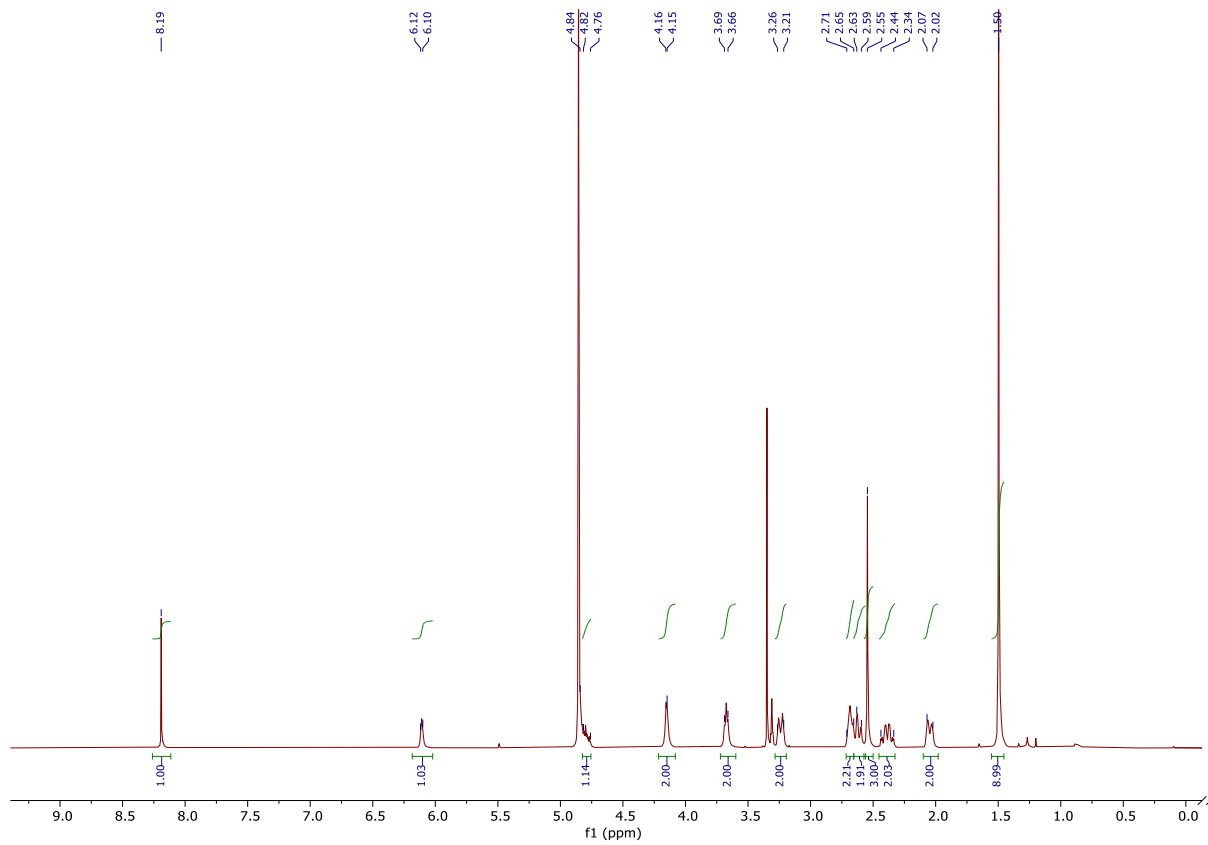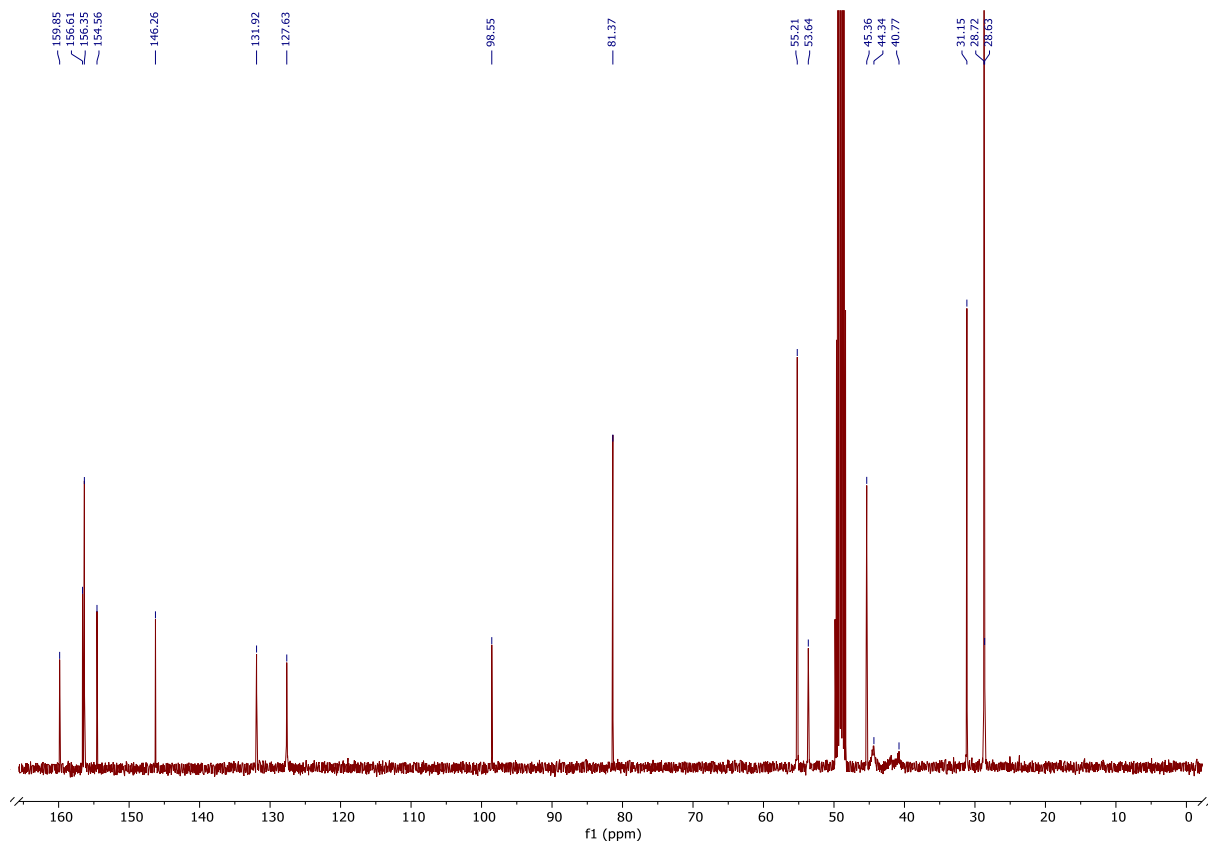

**1-(4-(4-amino-1-(1-methylpiperidin-4-yl)-1H-pyrazolo[3,4-d]pyrimidin-3-yl)-3,6-dihydropyridin-1(2H)-yl)prop-2-en-1-one (12)**

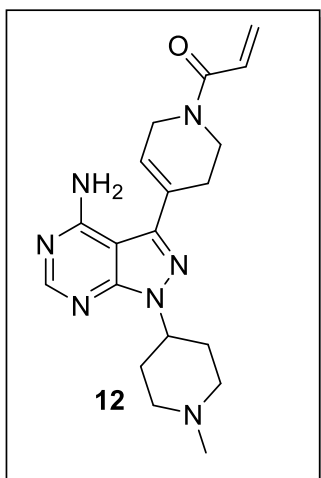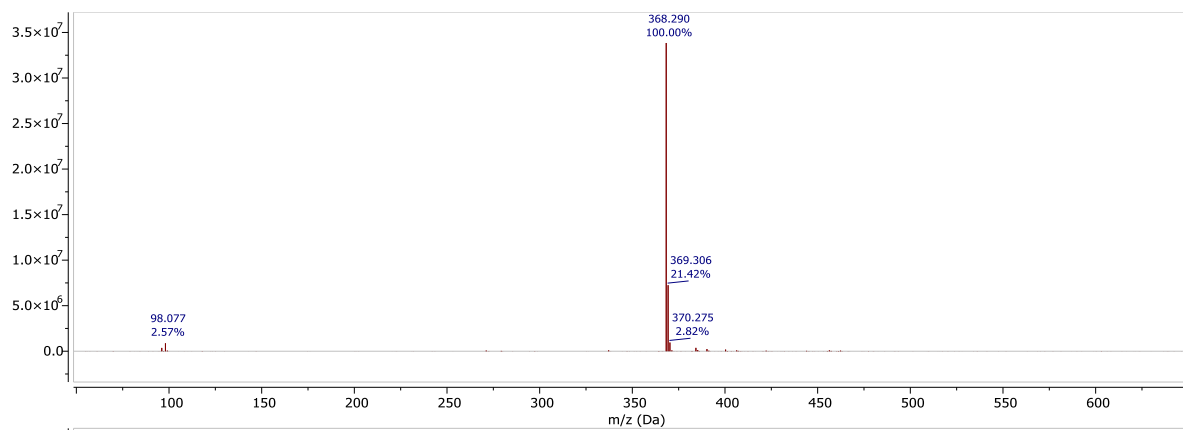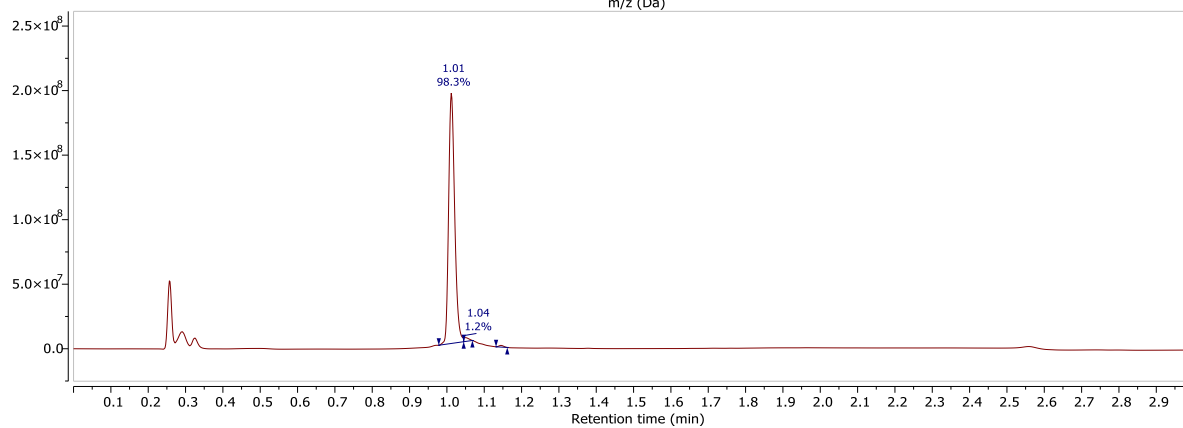

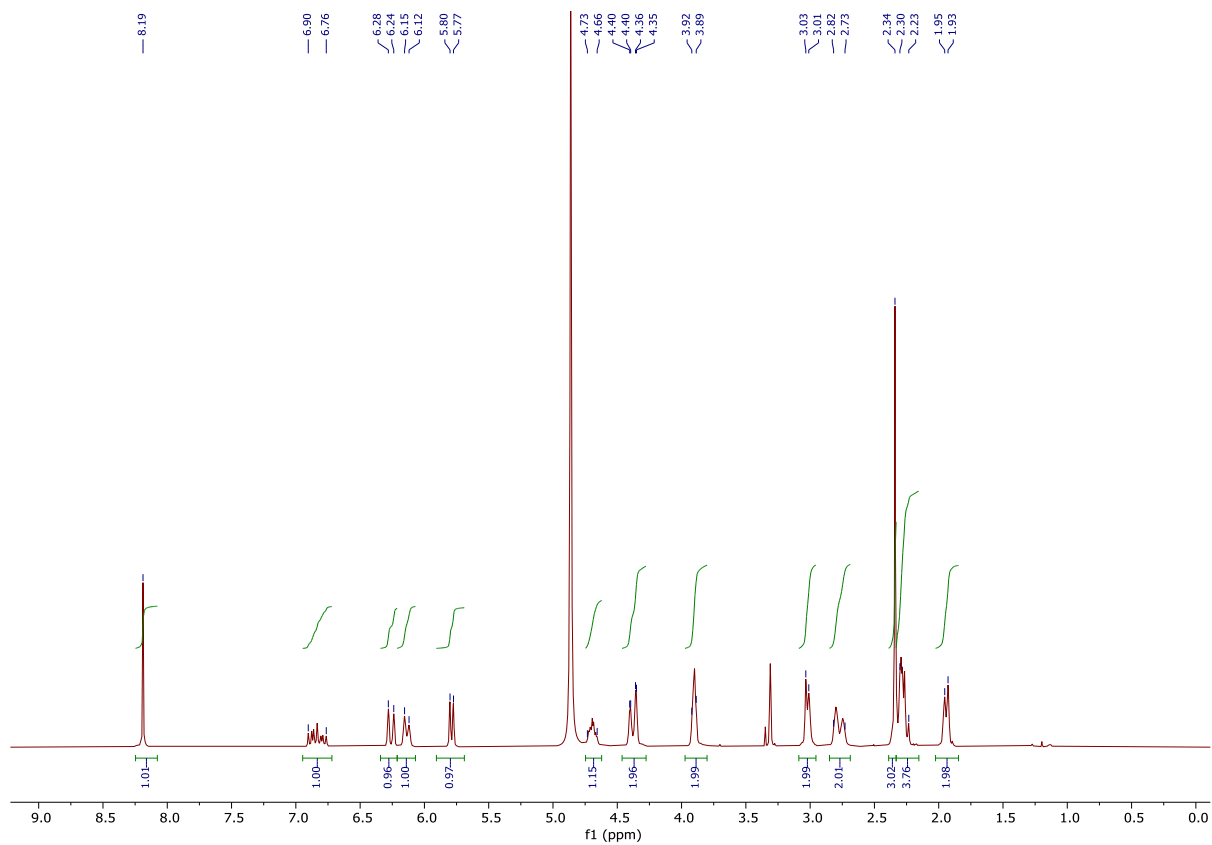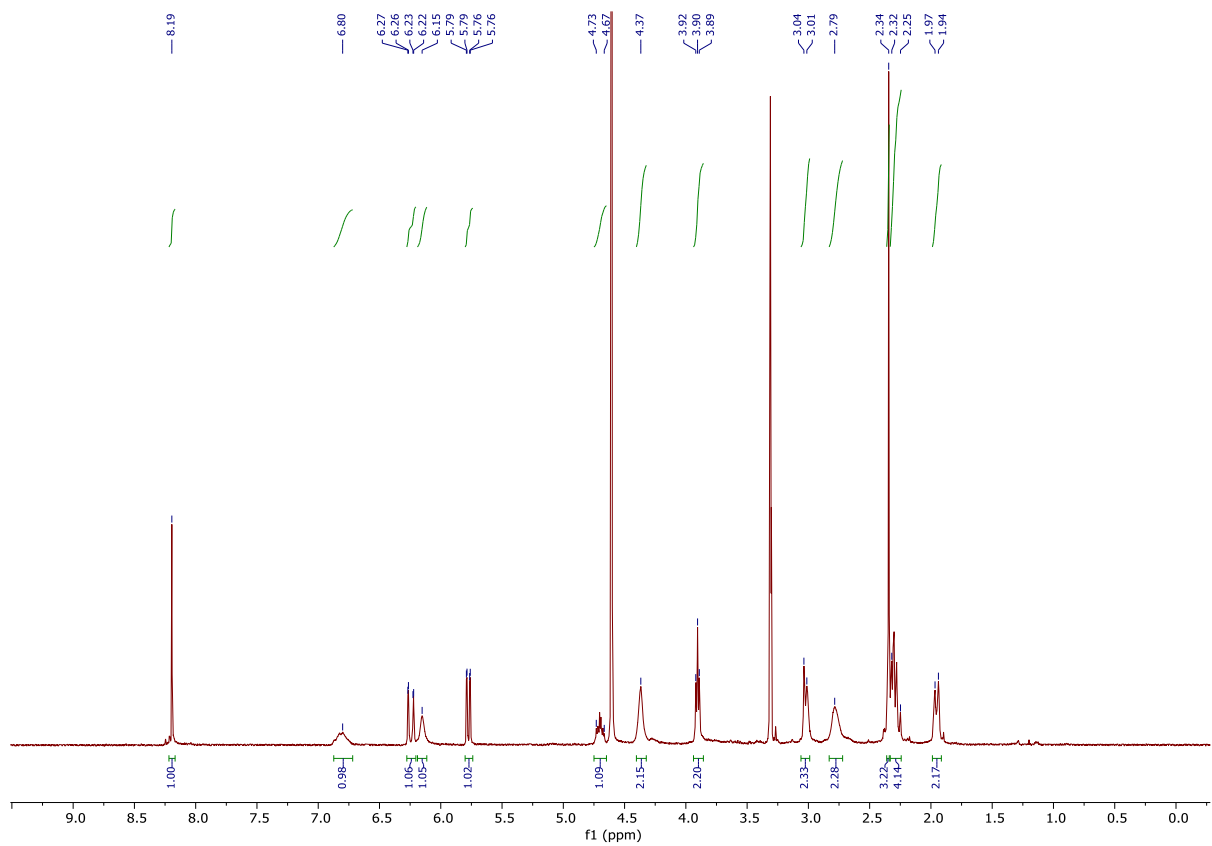



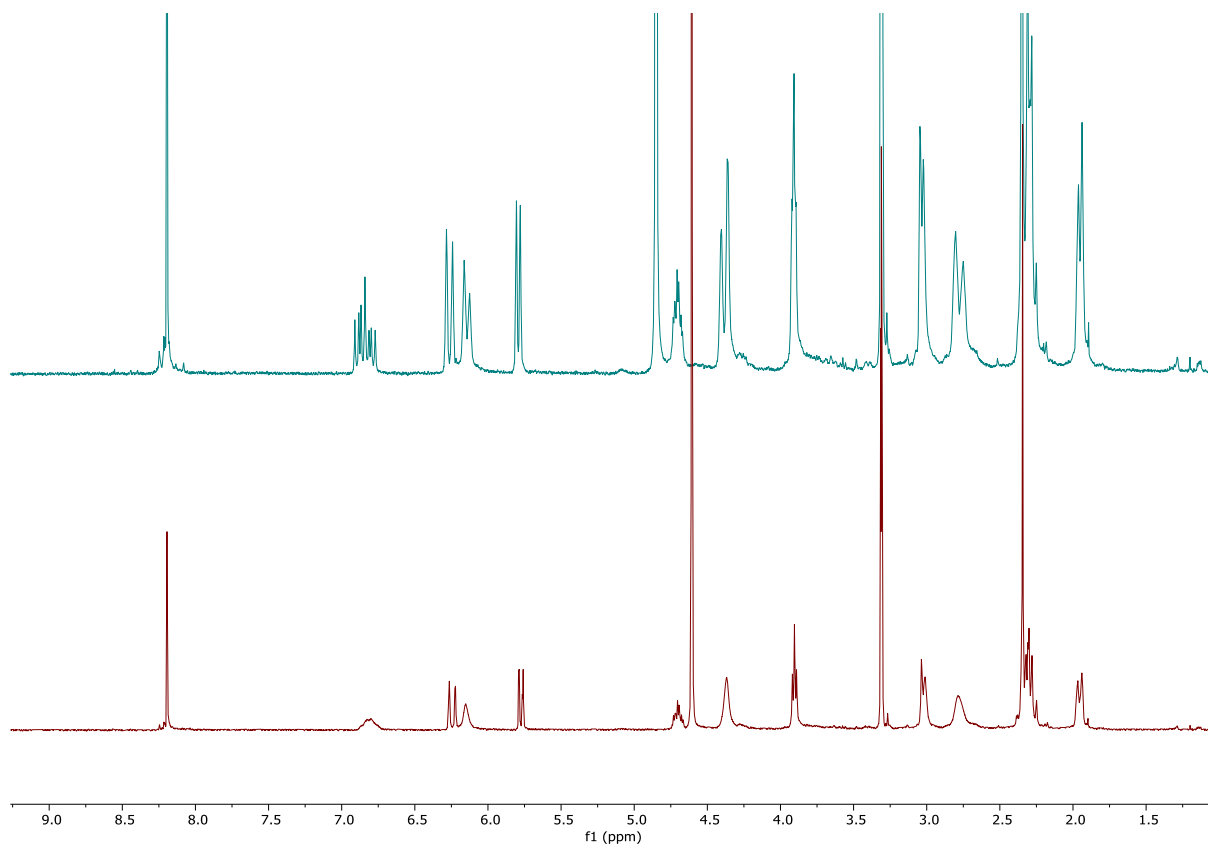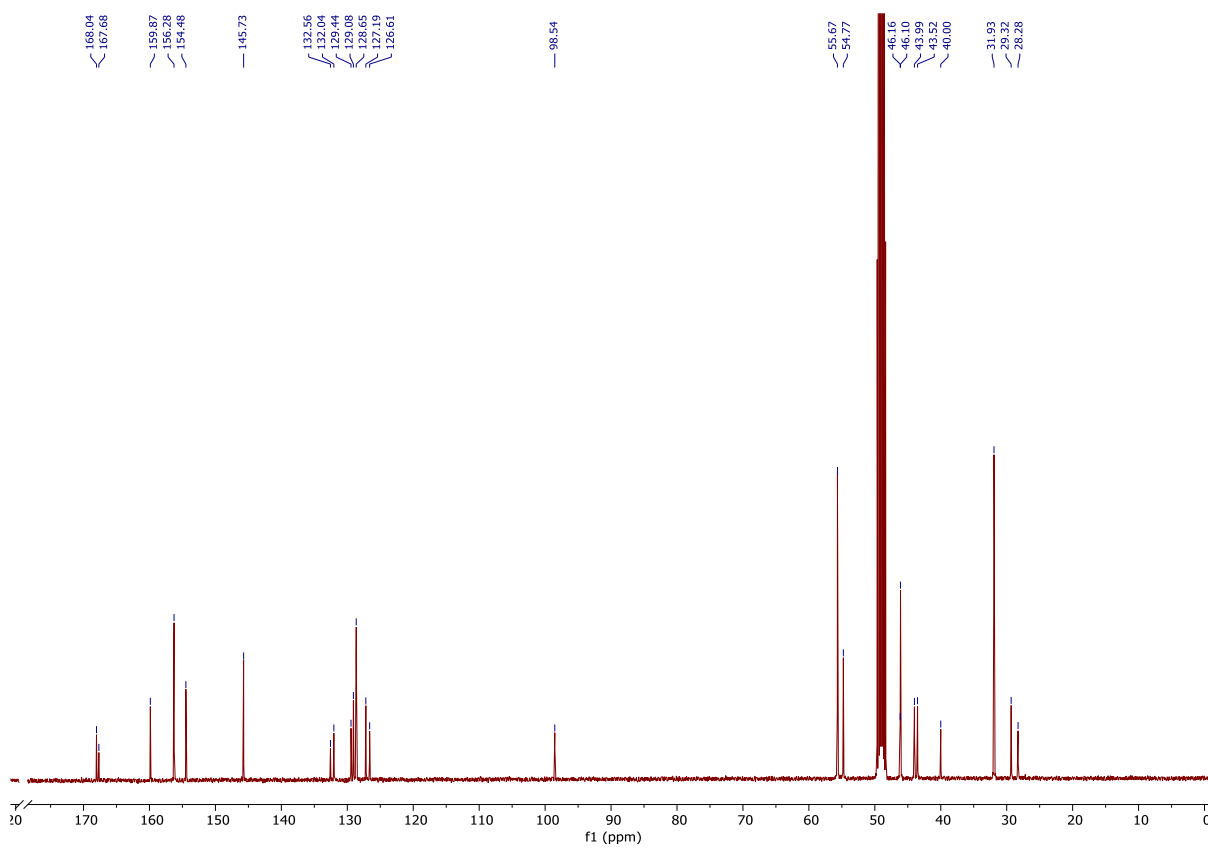

- 168.04
- 167.88
- 159.67
- 156.38
- 154.88
- 145.73
- 132.56
- 132.04
- 129.44
- 129.08
- 128.65
- 127.19
- 126.61
- 98.54
- 55.67
- 54.77
- 46.16
- 46.10
- 43.99
- 43.52
- 40.00
- 31.93
- 29.32
- 28.28

**Tert-butyl 5-(4-amino-1-(1-methylpiperidin-4-yl)-1H-pyrazolo[3,4-d]pyrimidin-3-yl)-3,6-dihydropyridine-1(2H)-carboxylate (18b)**

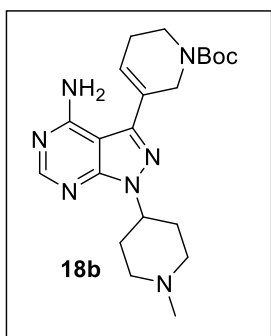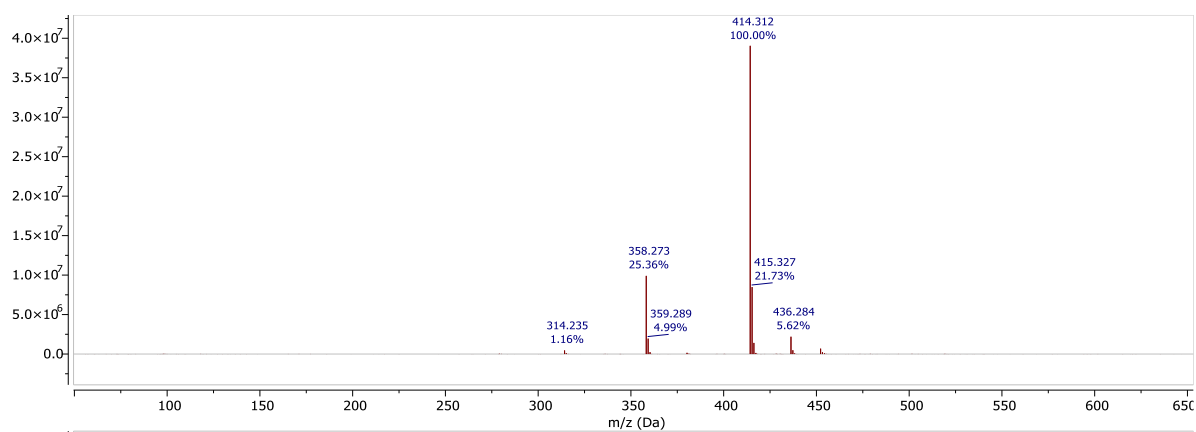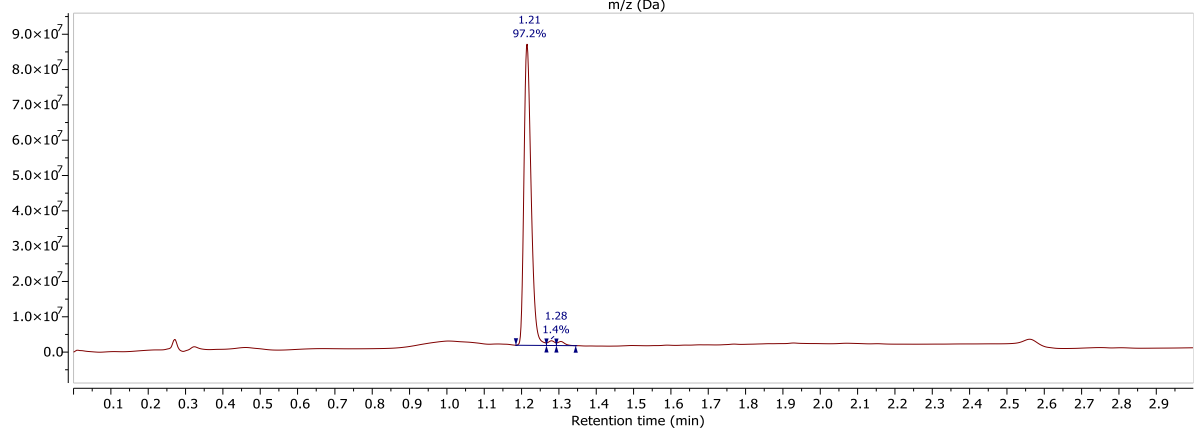

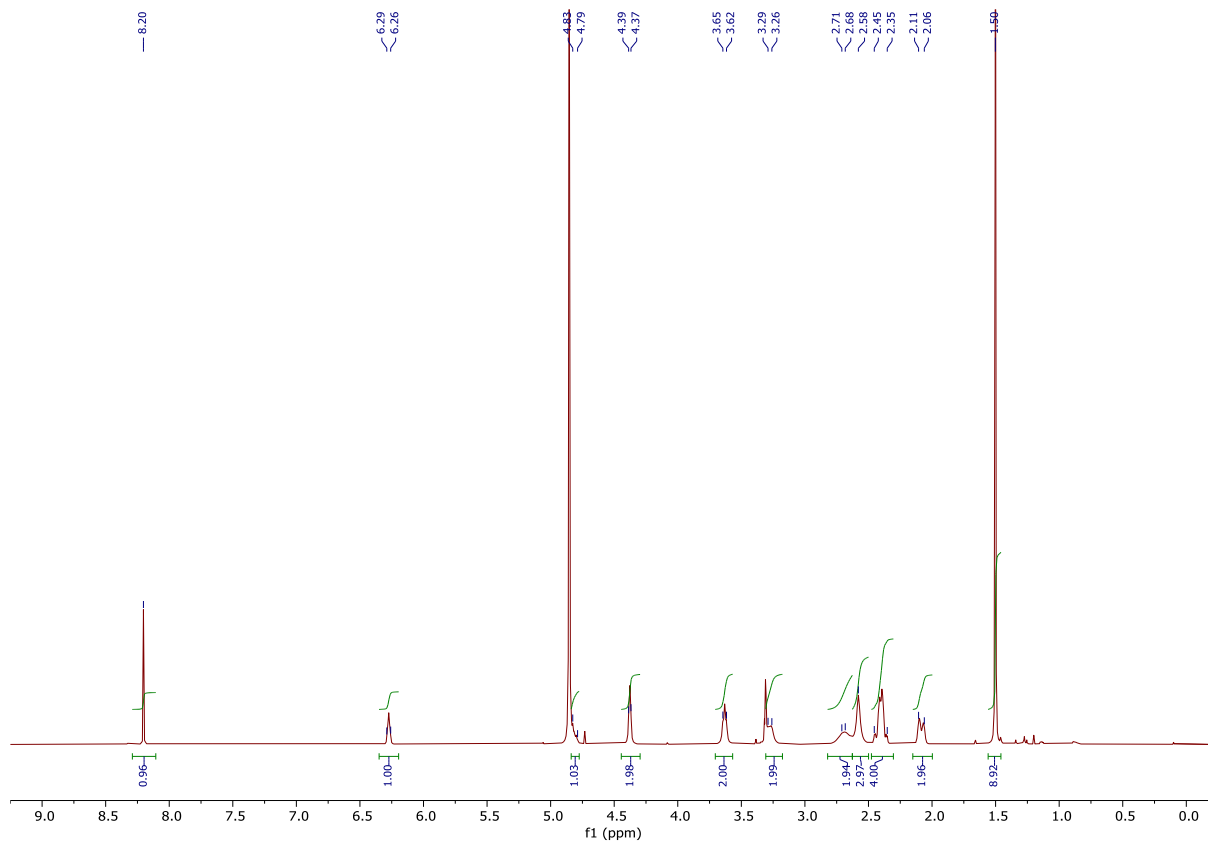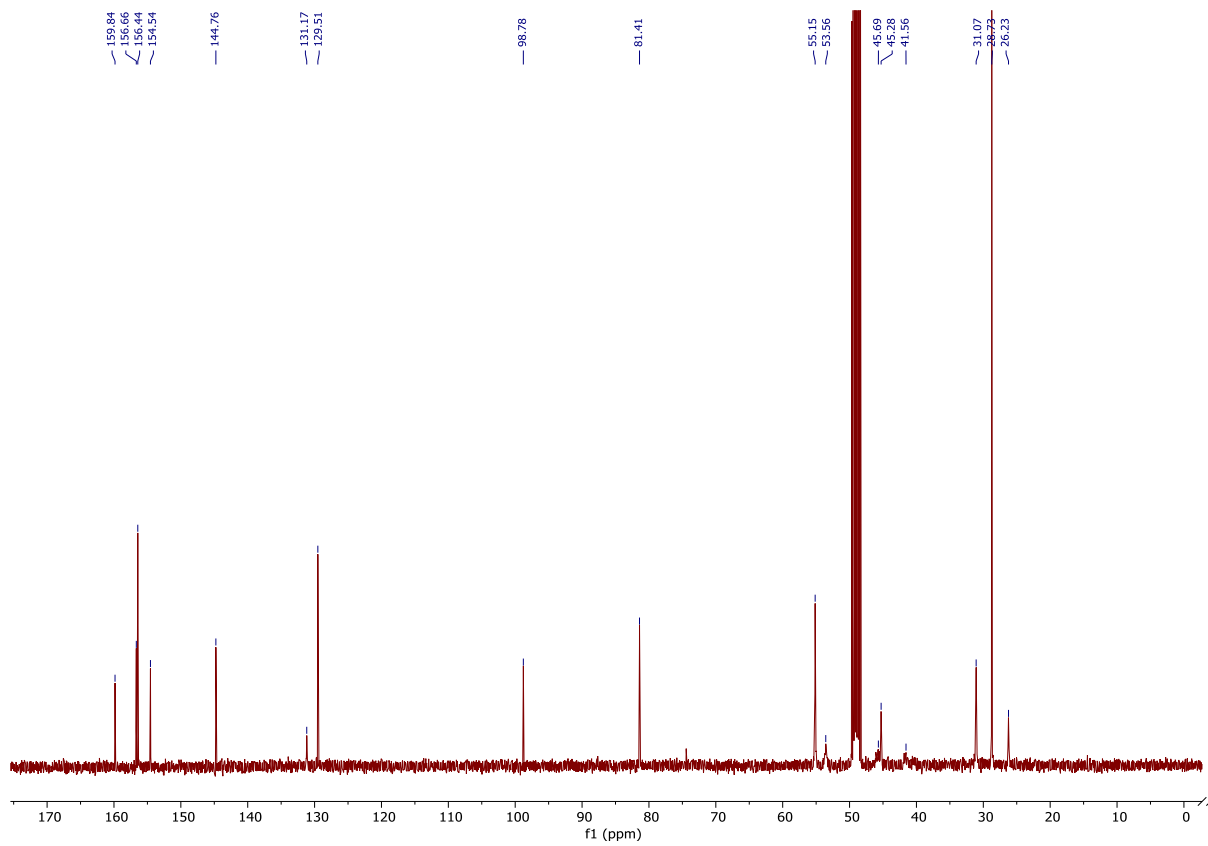

1-(5-(4-amino-1-(1-methylpiperidin-4-yl)-1H-pyrazolo[3,4-d]pyrimidin-3-yl)-3,6-dihydropyridin-1(2H)-yl)prop-2-en-1-one (13)

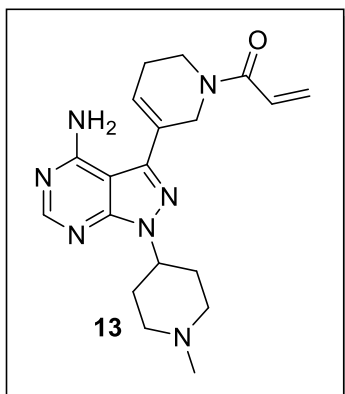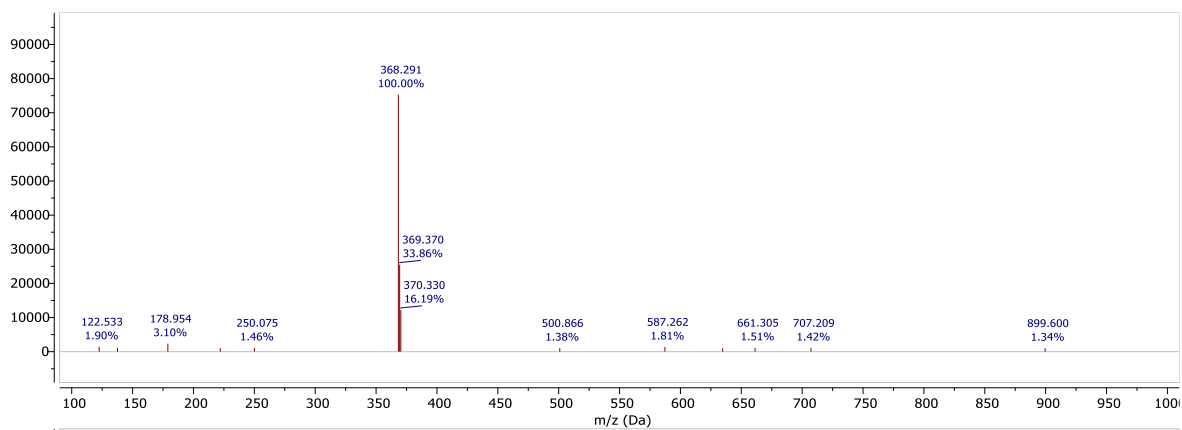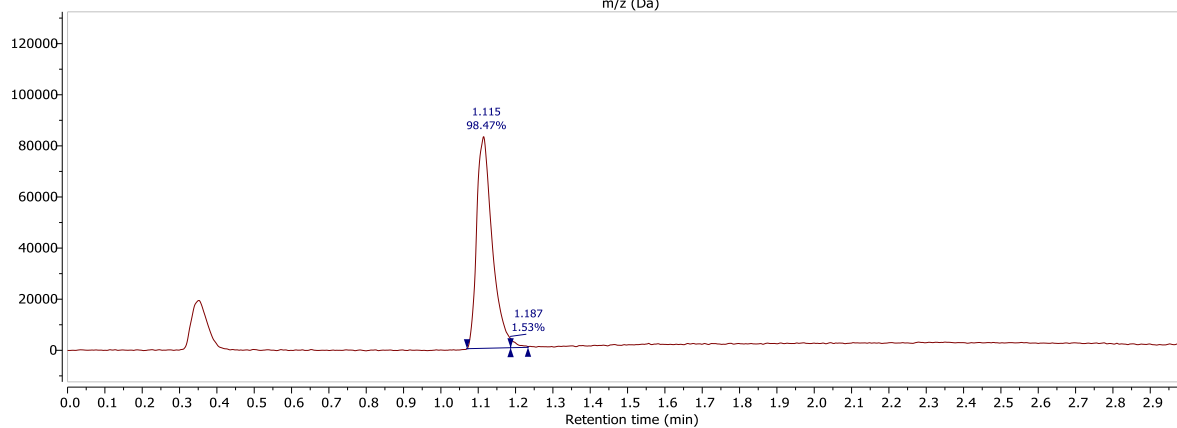

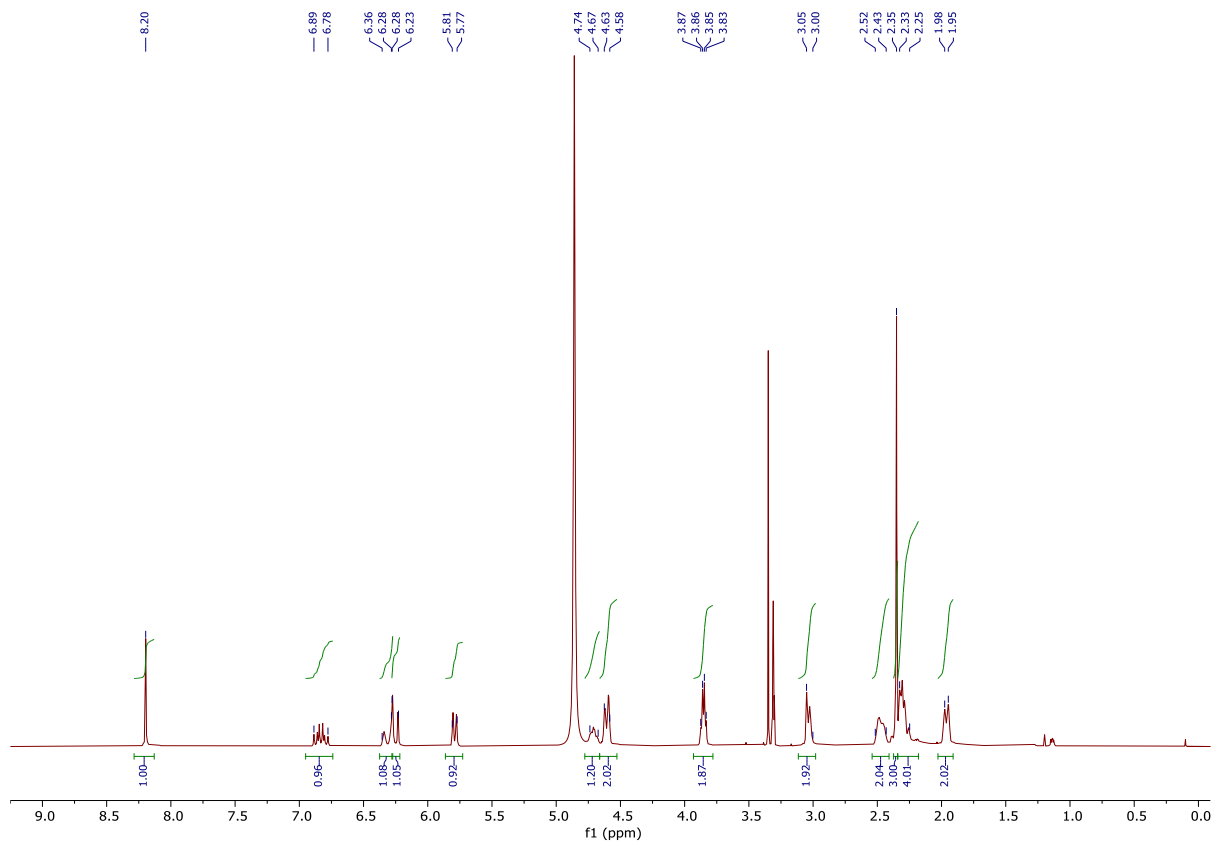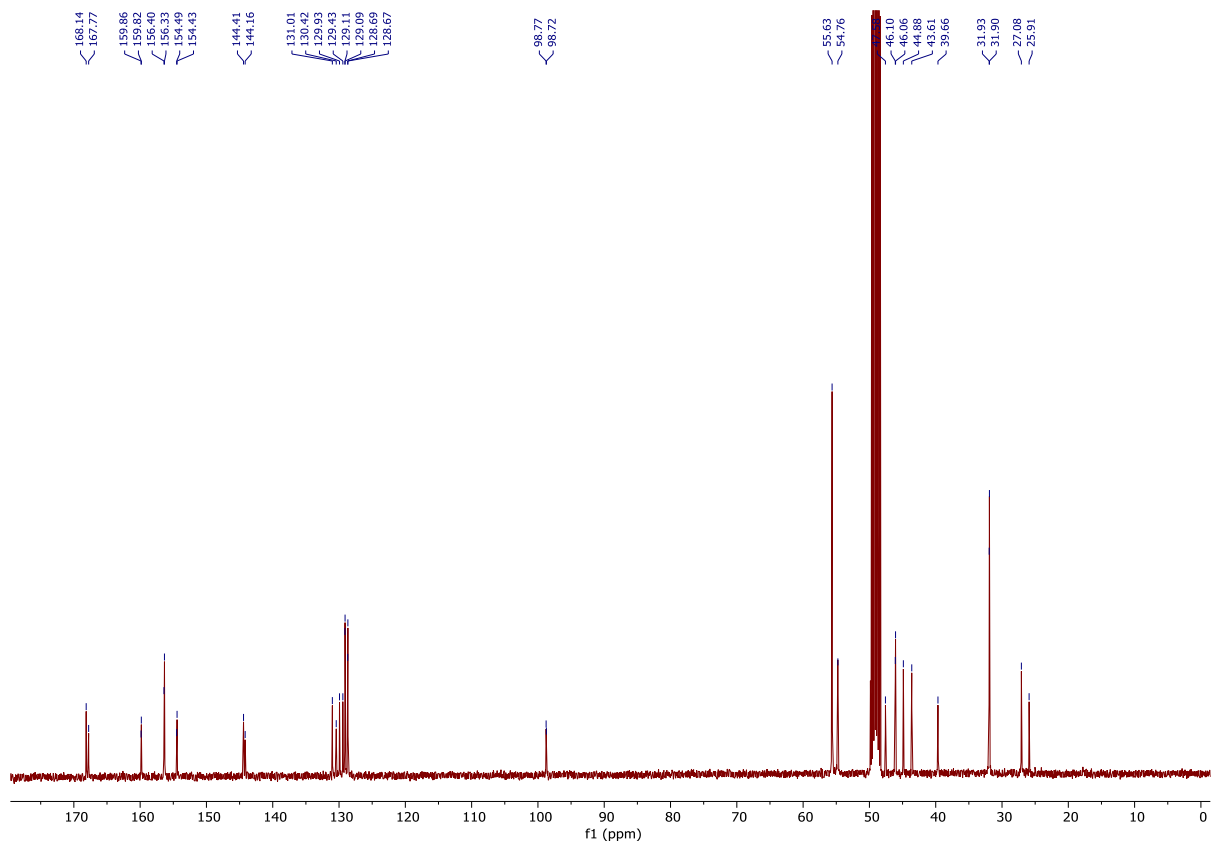

**Tert-butyl (4-(4-amino-1-(1-methylpiperidin-4-yl)-1H-pyrazolo[3,4-d]pyrimidin-3-yl)benzyl)carbamate (18c)**

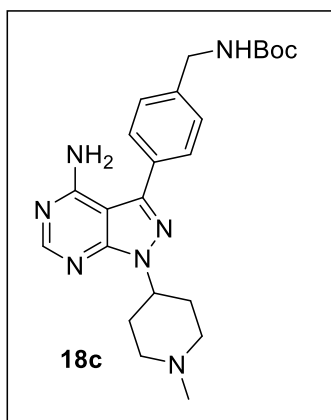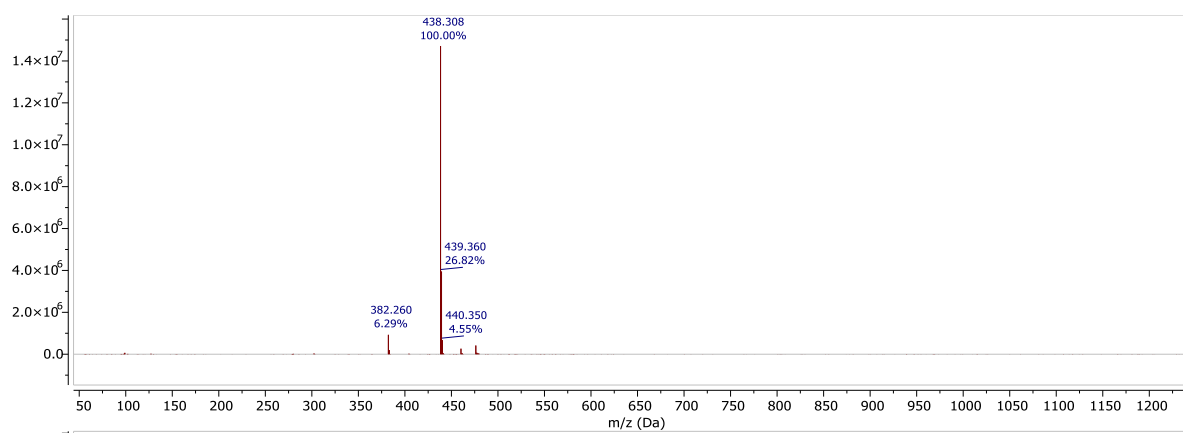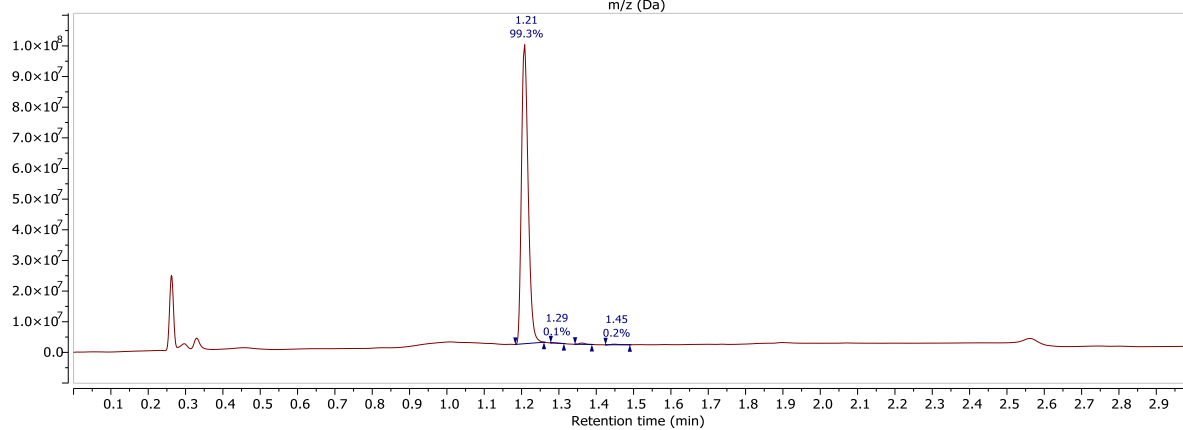

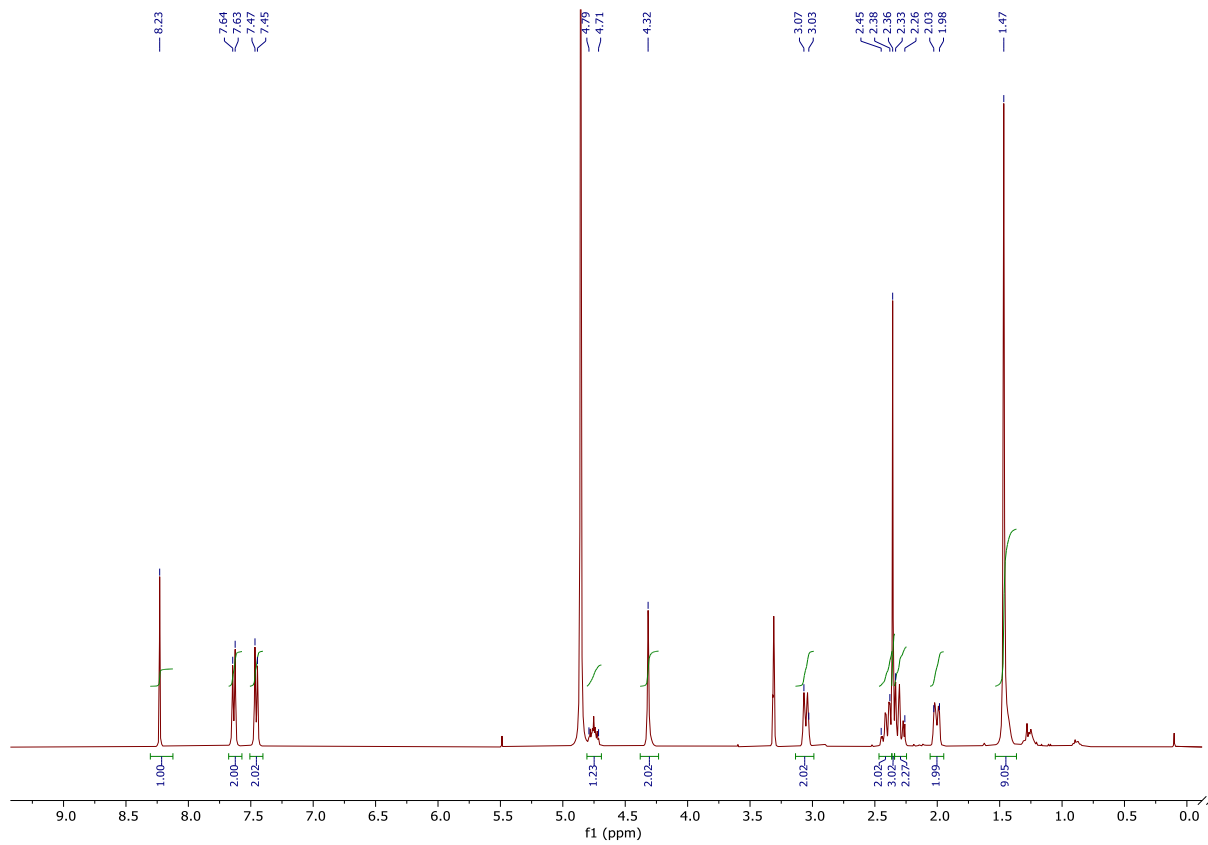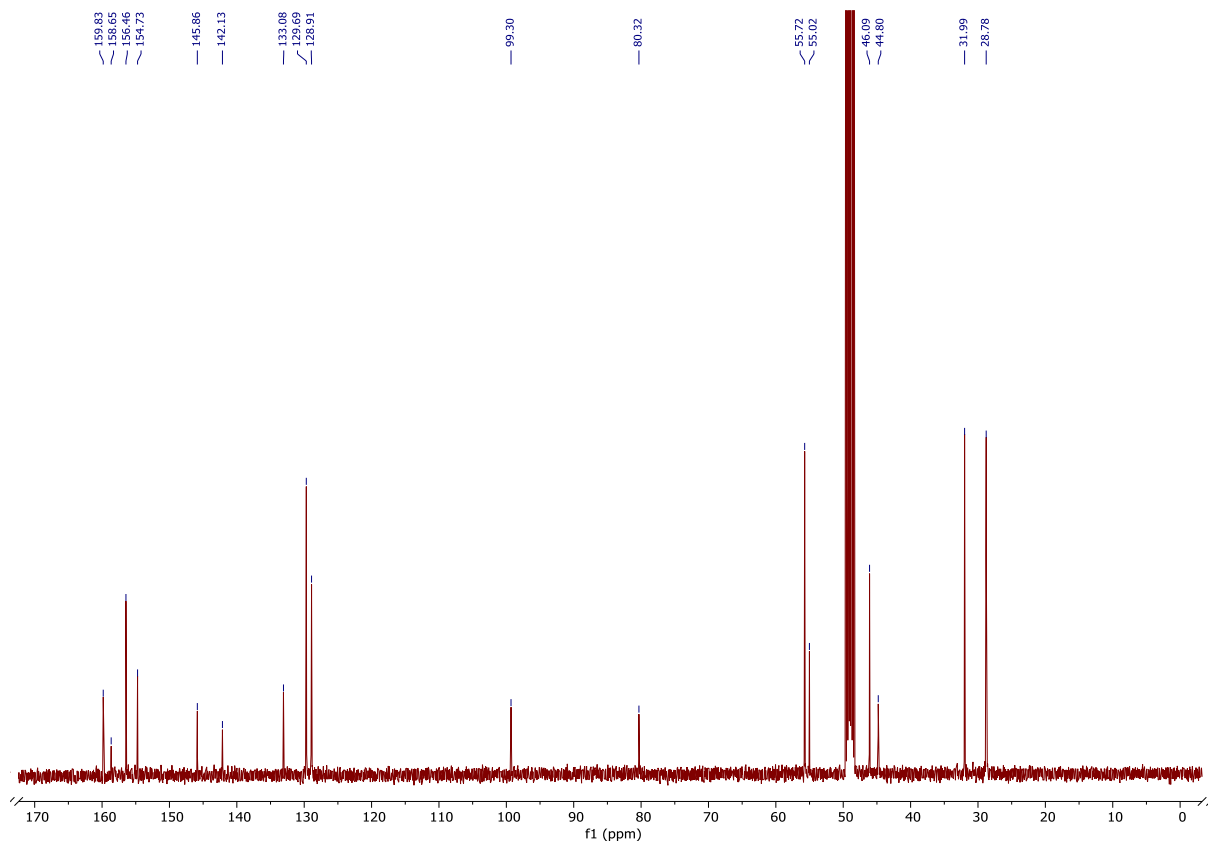

**N-(4-(4-amino-1-(1-methylpiperidin-4-yl)-1H-pyrazolo[3,4-d]pyrimidin-3-yl)benzyl)acrylamide (14)**

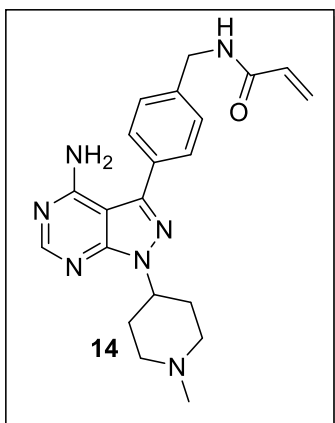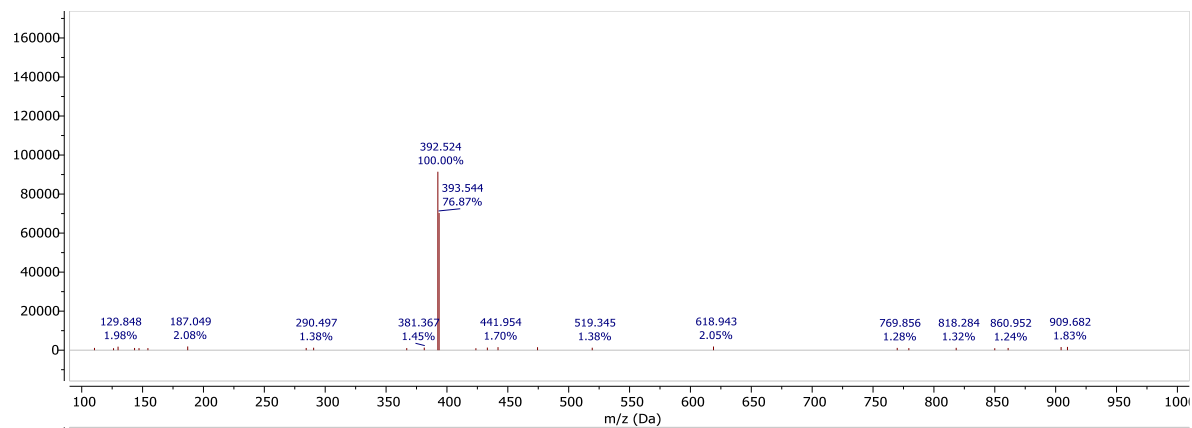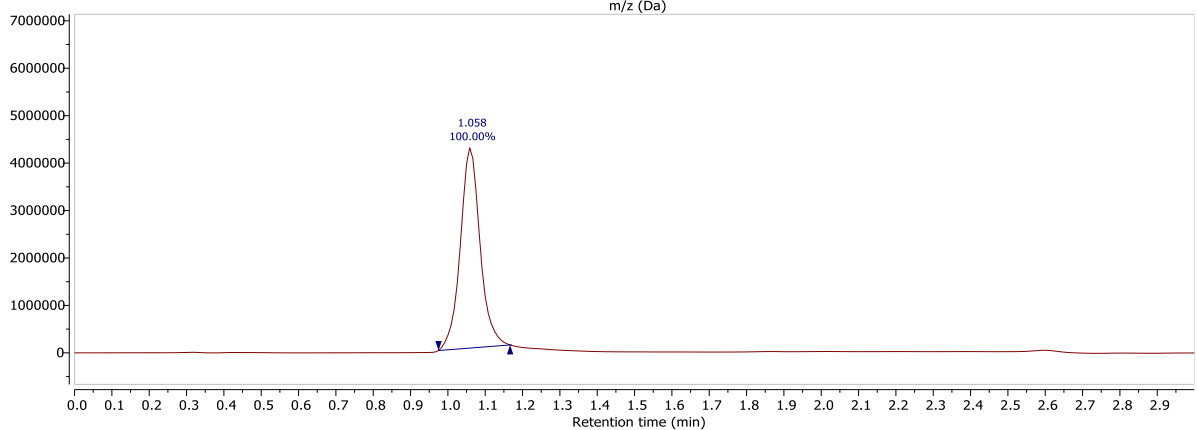



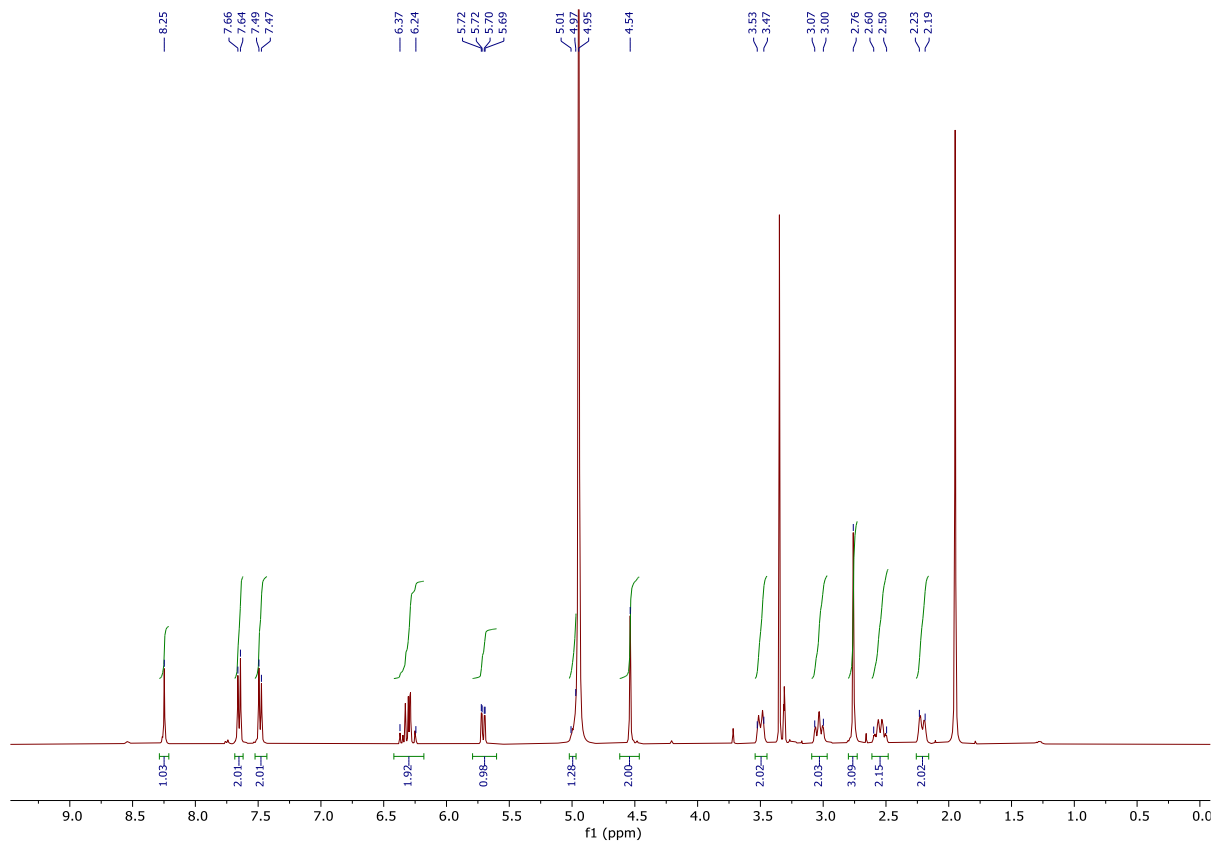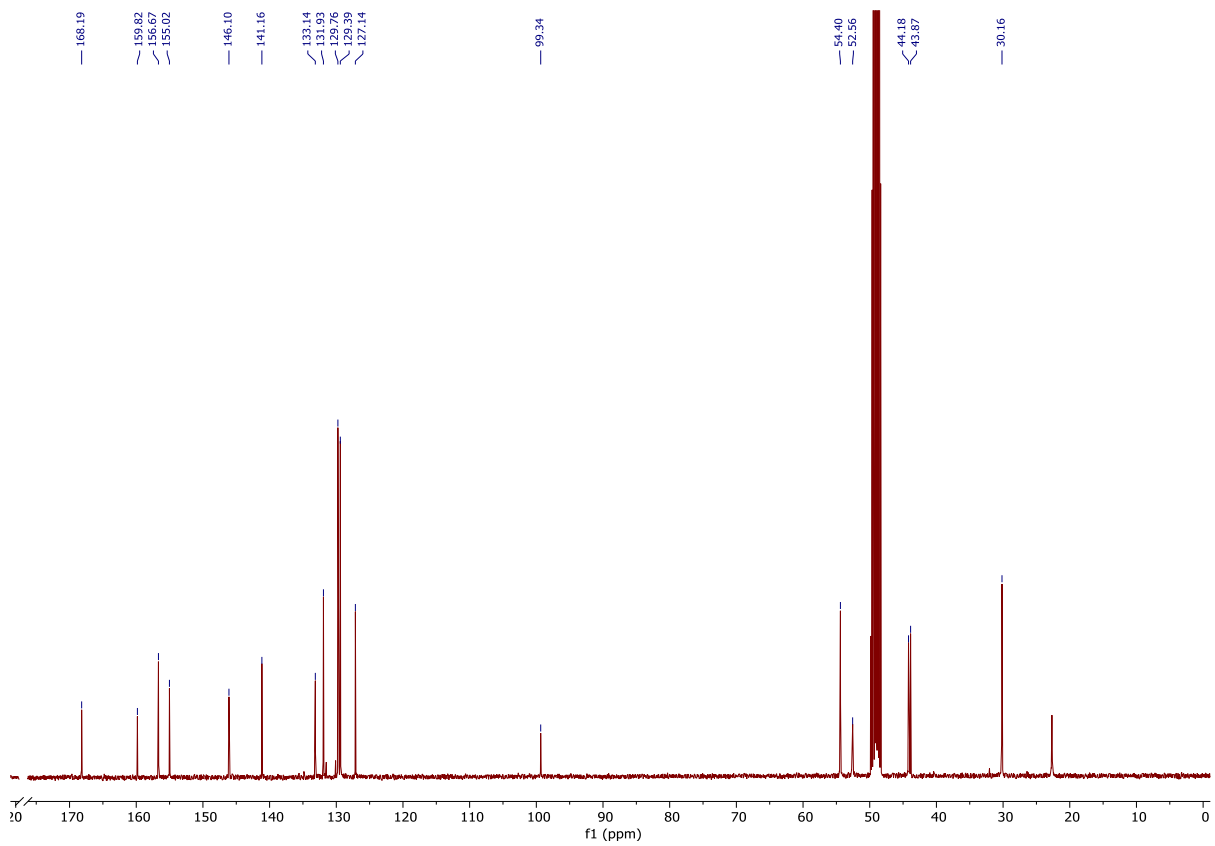

**Tert-butyl 4-(4-amino-1-(1-methylpiperidin-4-yl)-1H-pyrazolo[3,4-d]pyrimidin-3-yl)piperidine-1-carboxylate (19)**

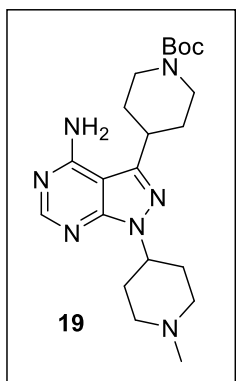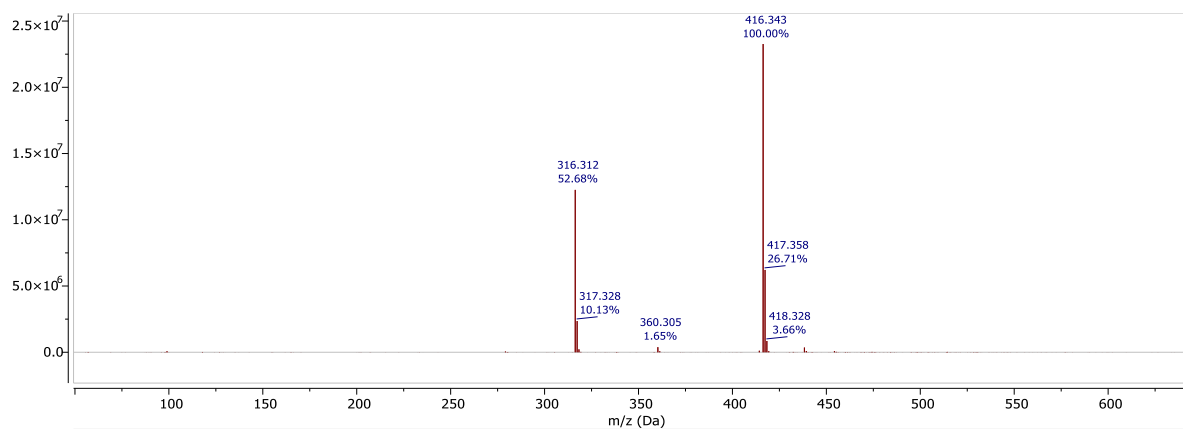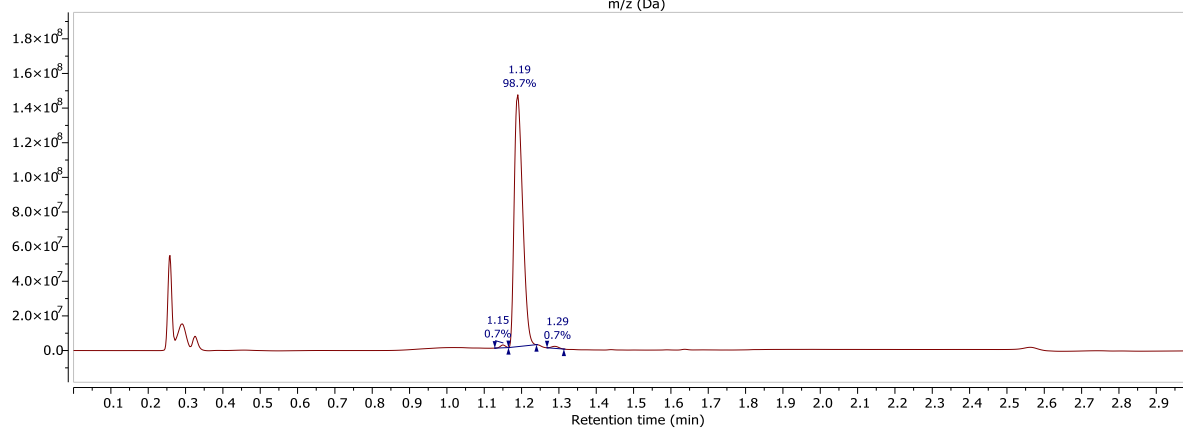

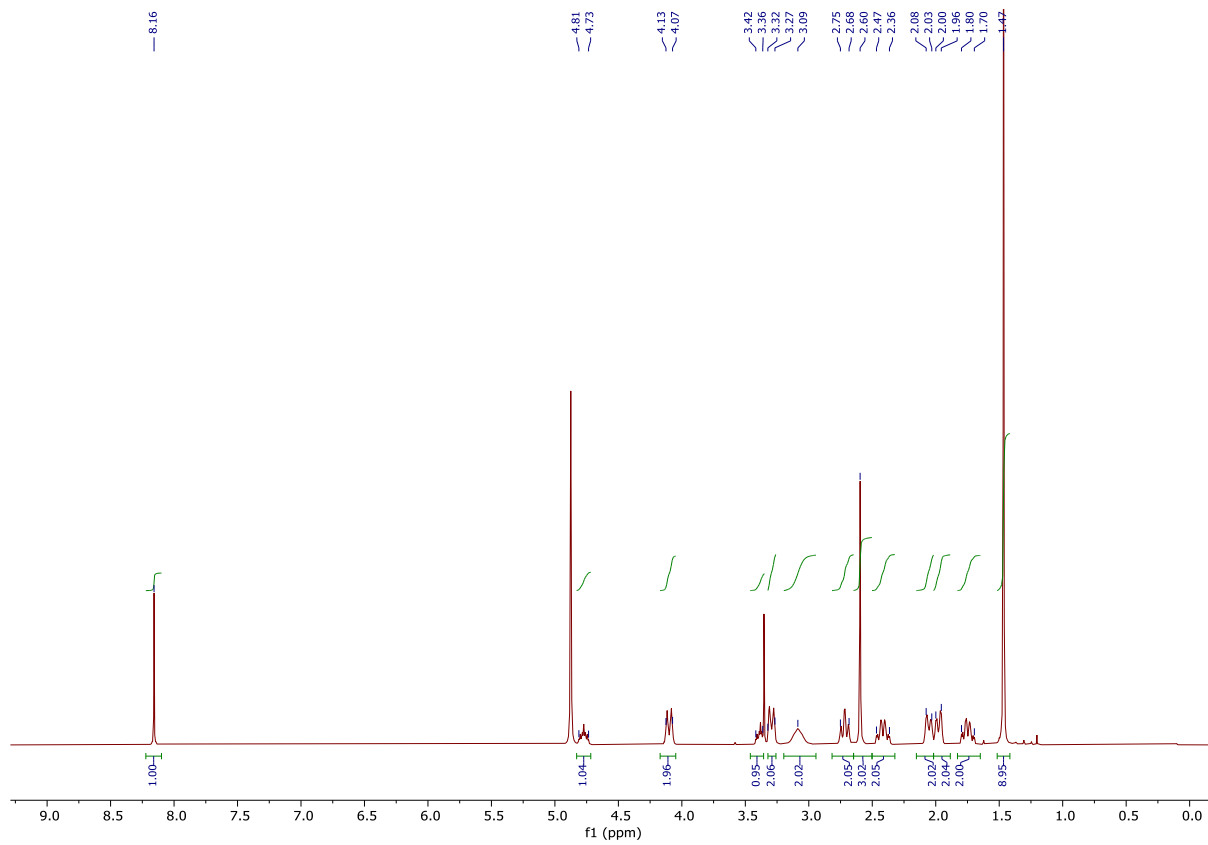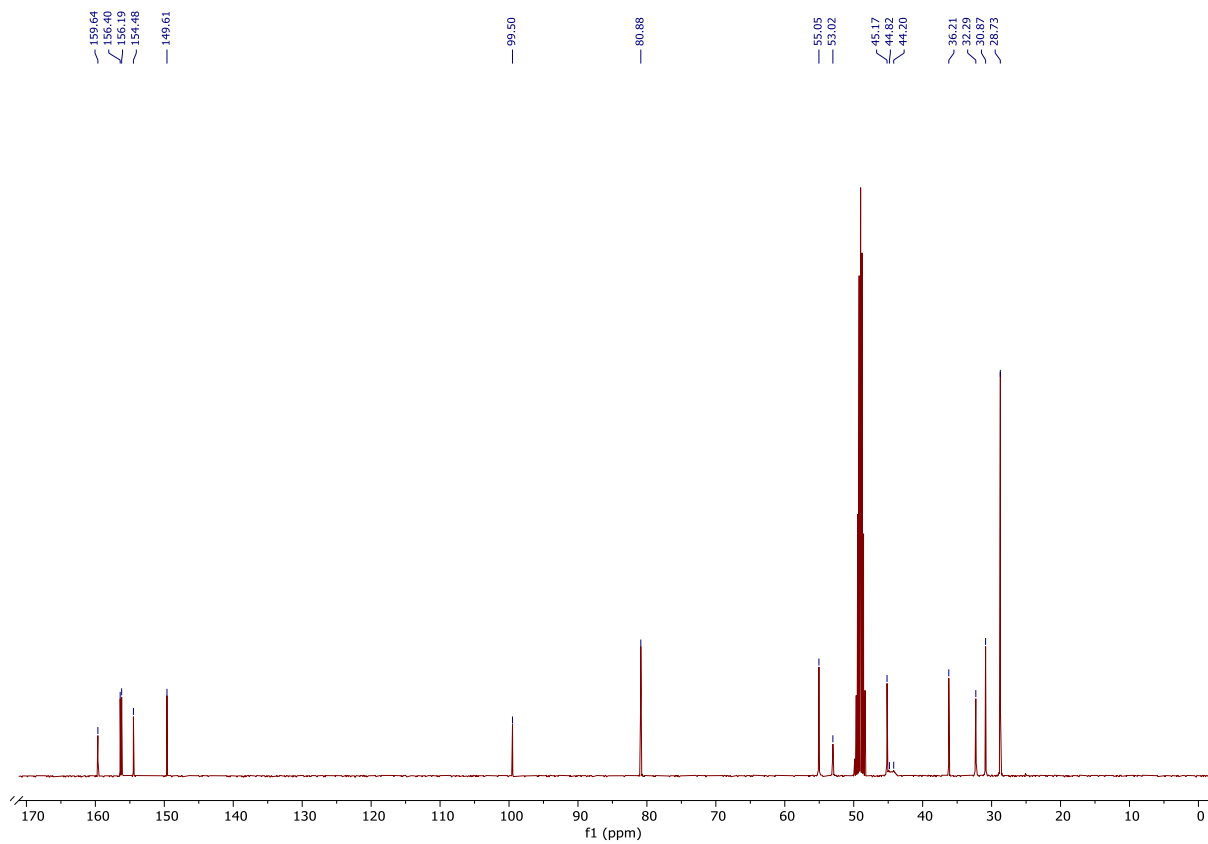

**1-(4-(4-amino-1-(1-methylpiperidin-4-yl)-1H-pyrazolo[3,4-d]pyrimidin-3-yl)piperidin-1-yl)prop-2-en-1-one (15)**

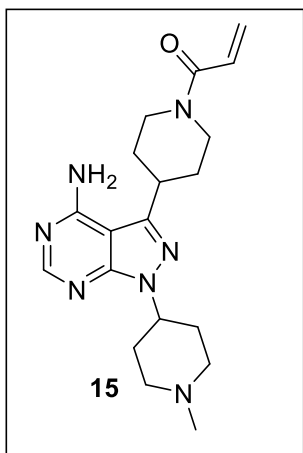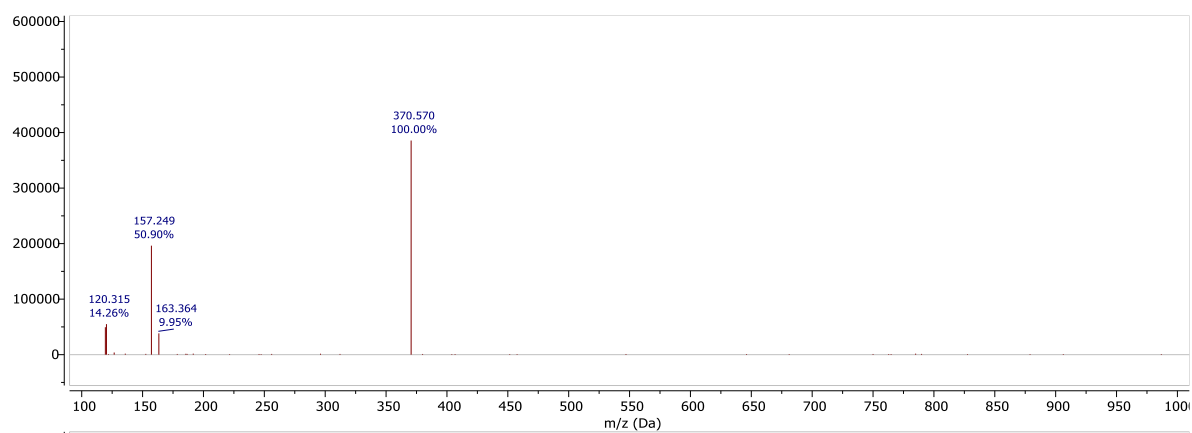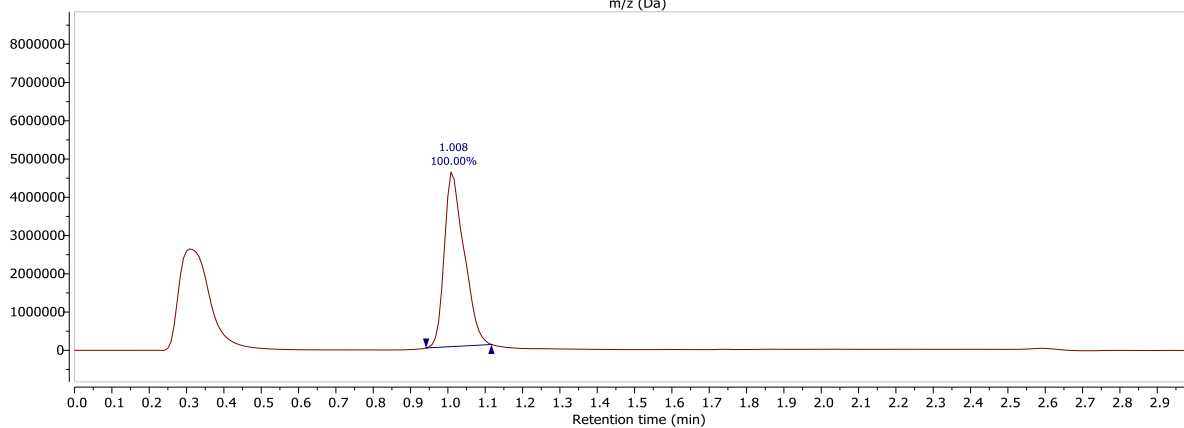

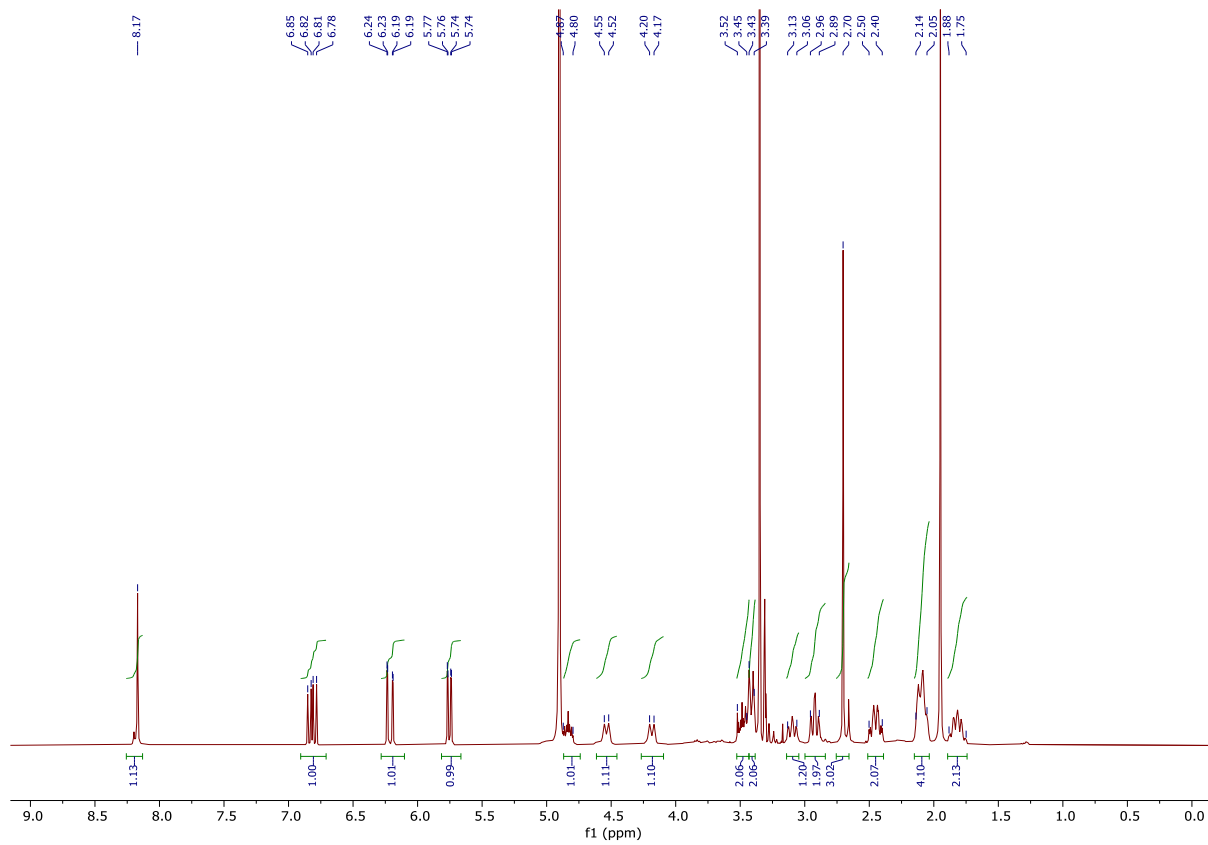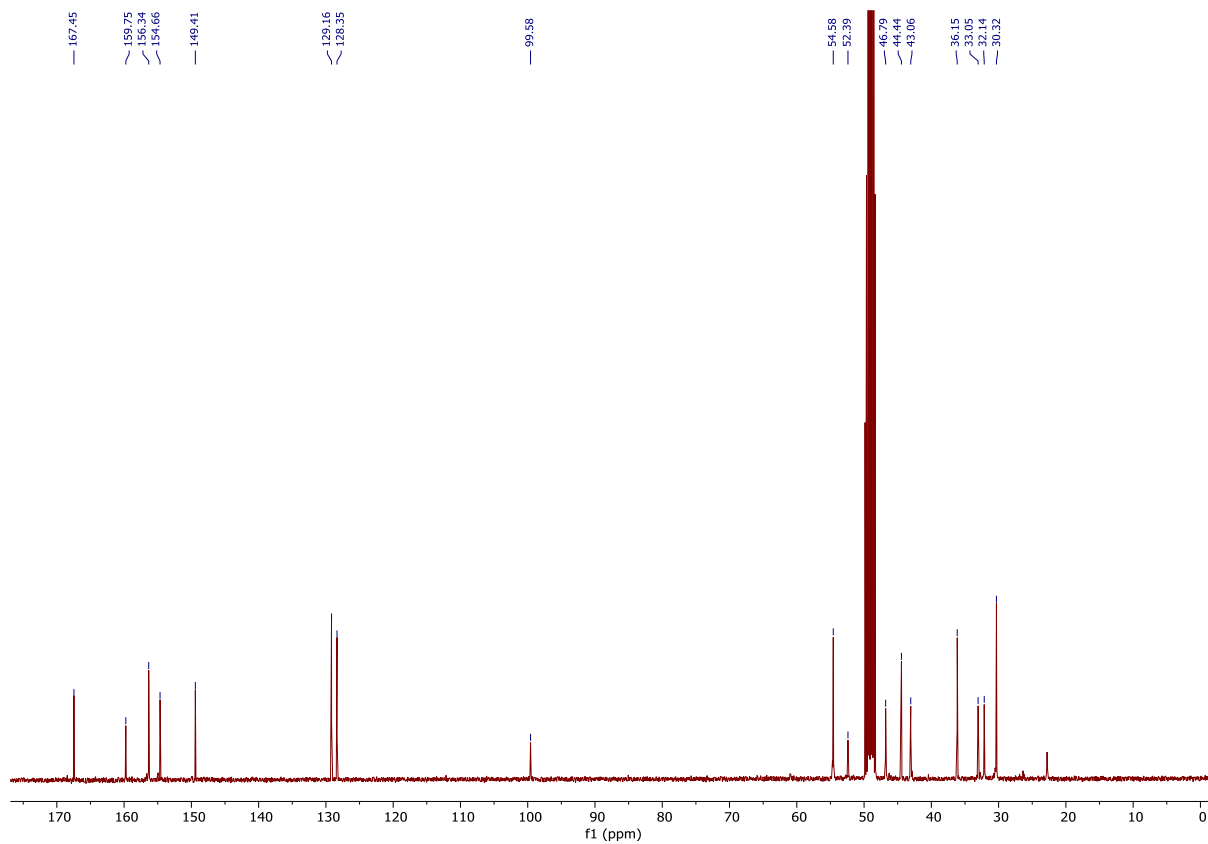

**Tert-butyl (4-(4-(7-((5-(3,4-dichlorophenyl)-1,3,4-oxadiazol-2-yl)methyl)-1,3-dimethyl-2,6-dioxo-2,3,6,7-tetrahydro-1H-purin-8-yl)piperazin-1-yl)butyl)carbamate**

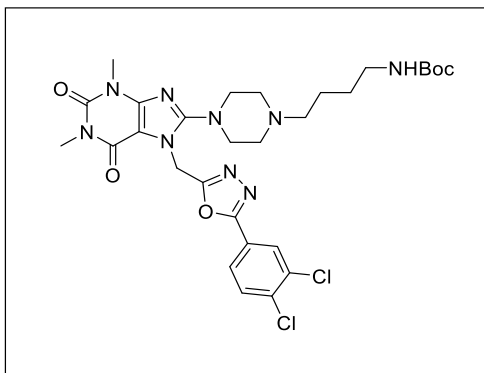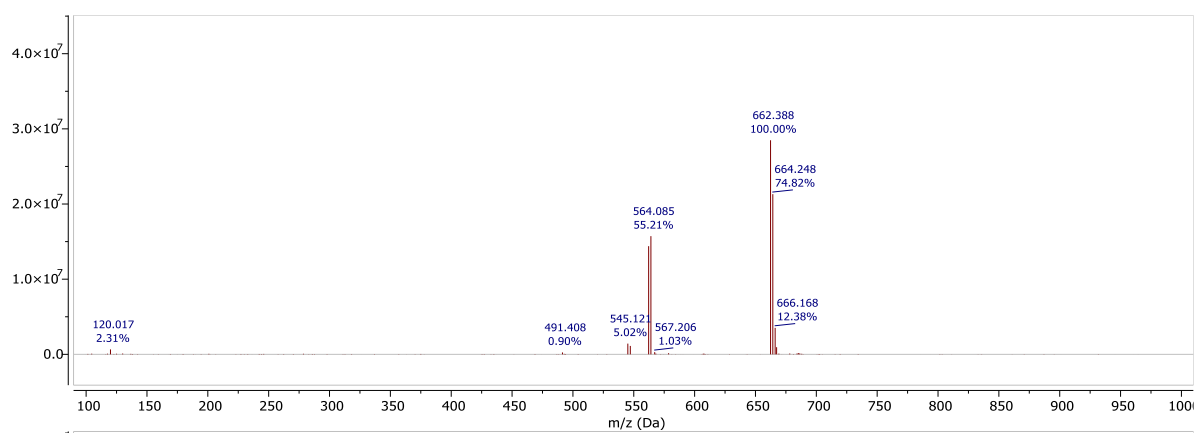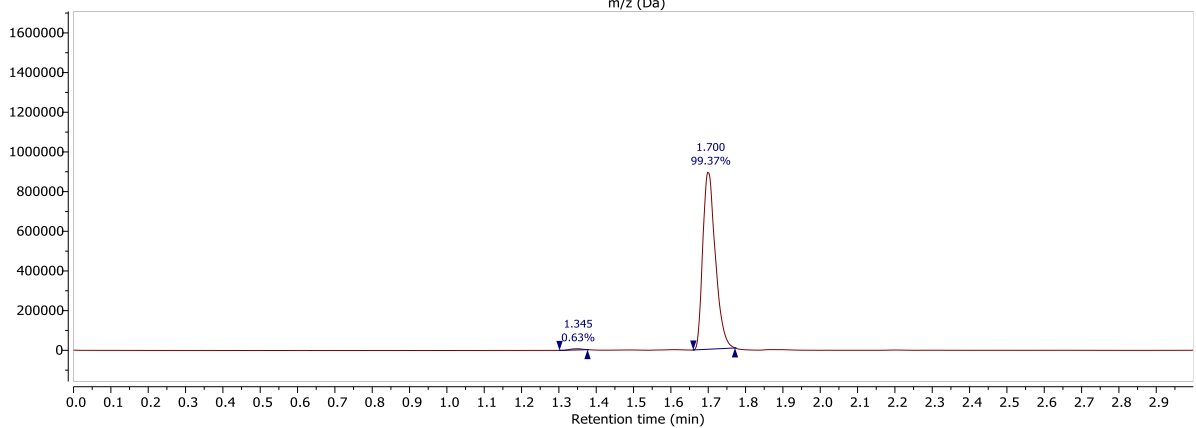

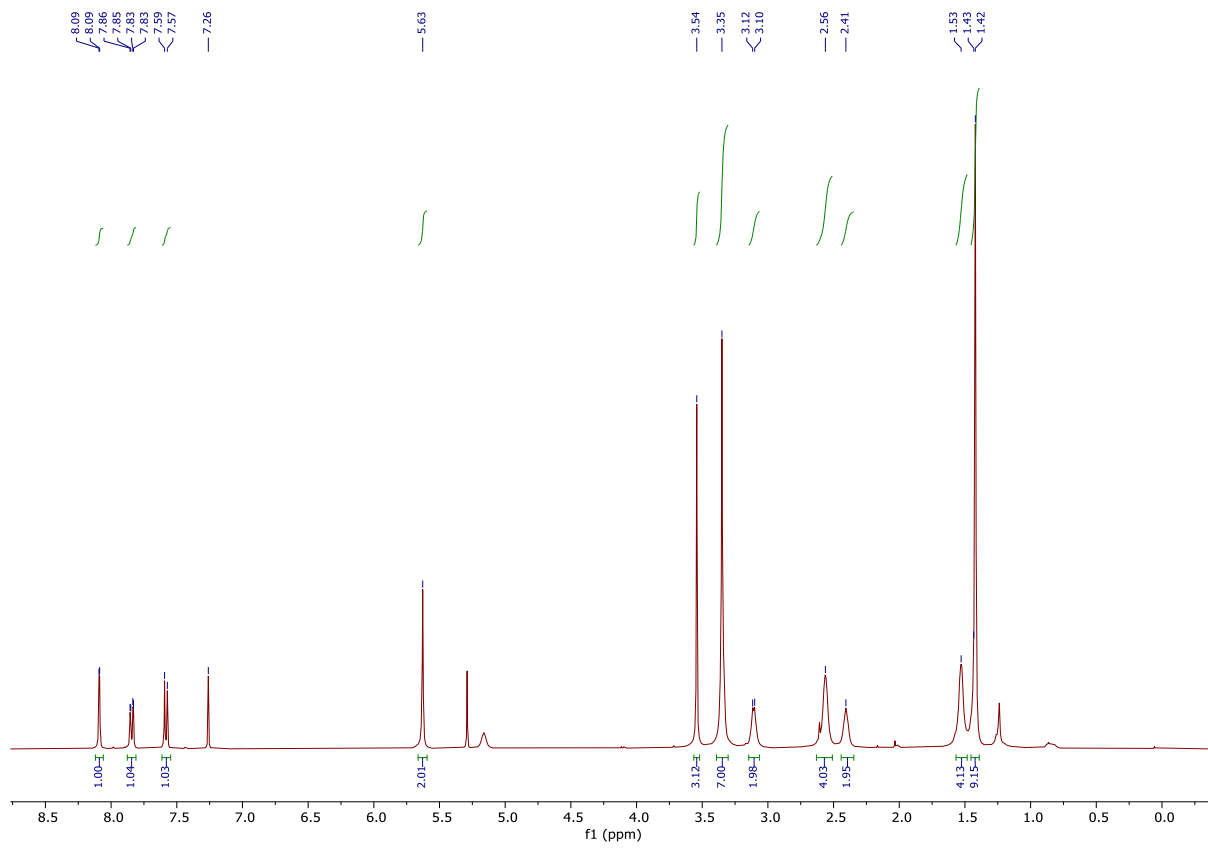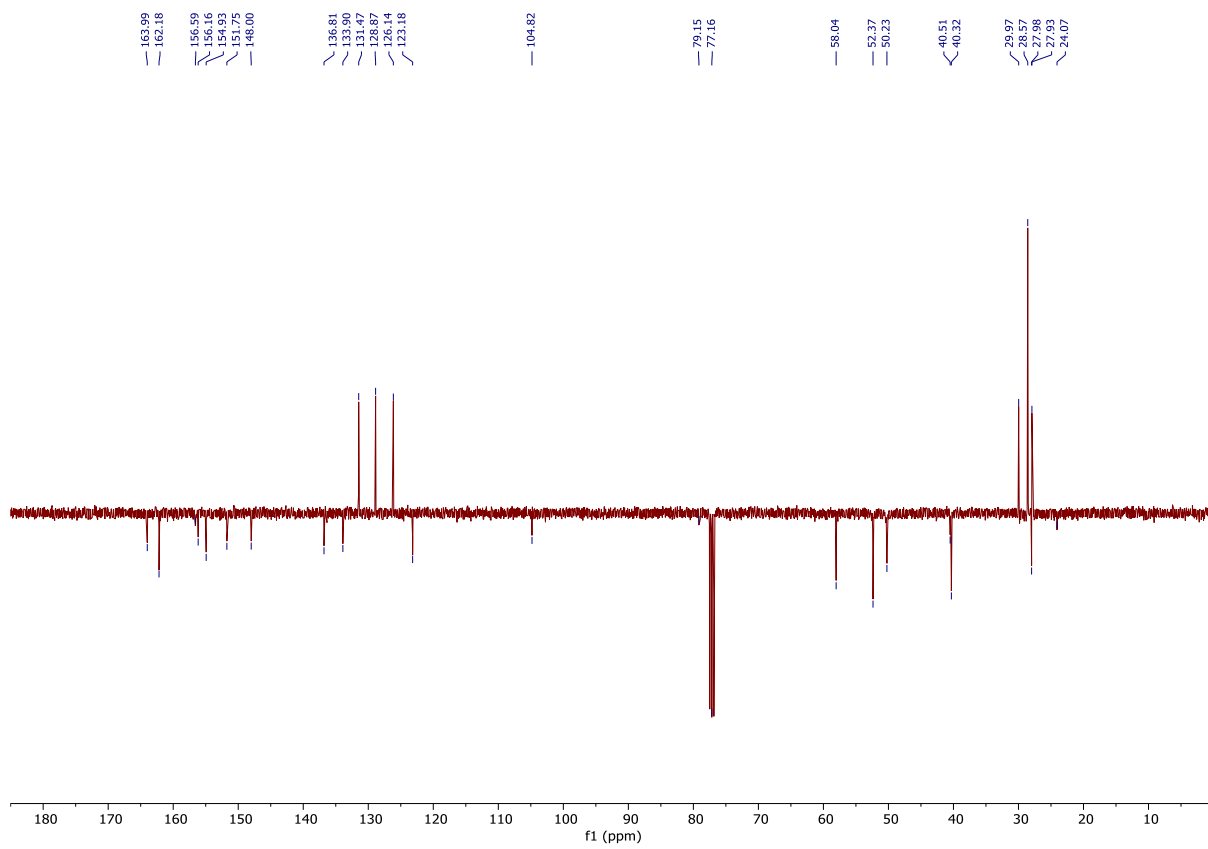

**4-(4-(7-((5-(3,4-dichlorophenyl)-1,3,4-oxadiazol-2-yl)methyl)-1,3-dimethyl-2,6-dioxo-2,3,6,7-tetrahydro-1H-purin-8-yl)piperazin-1-yl)butan-1-aminium trifluoroacetate, CBH-003 (7)**

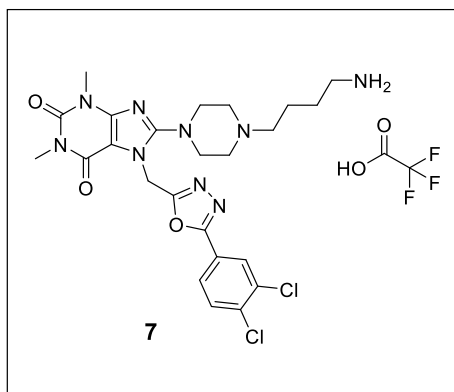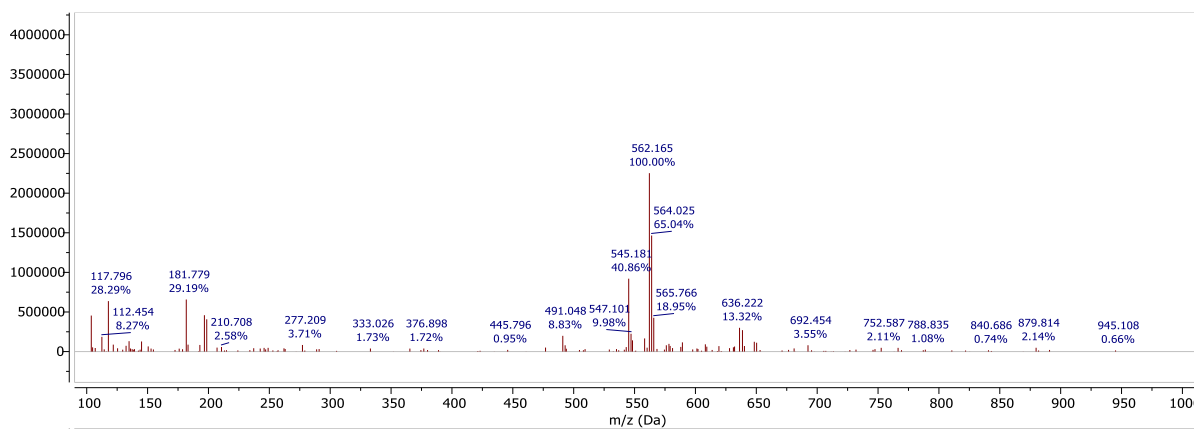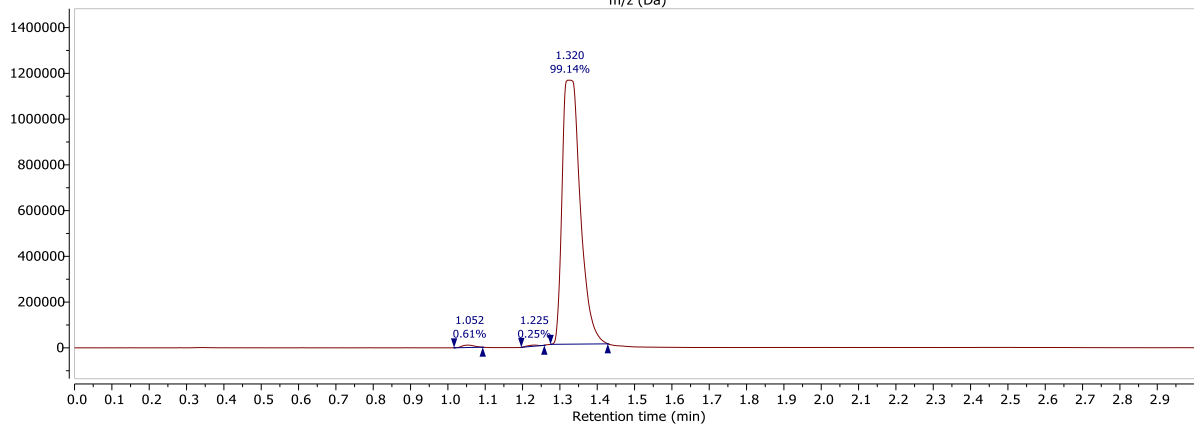



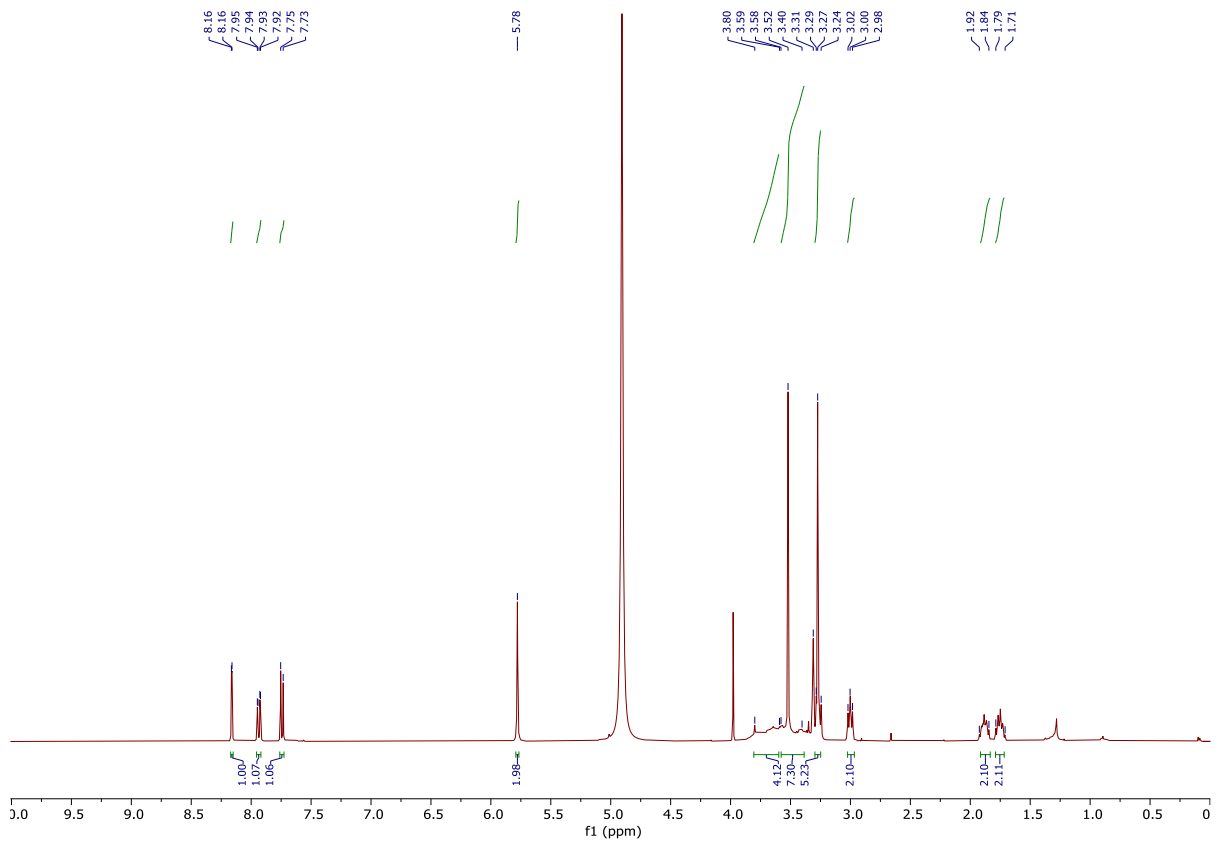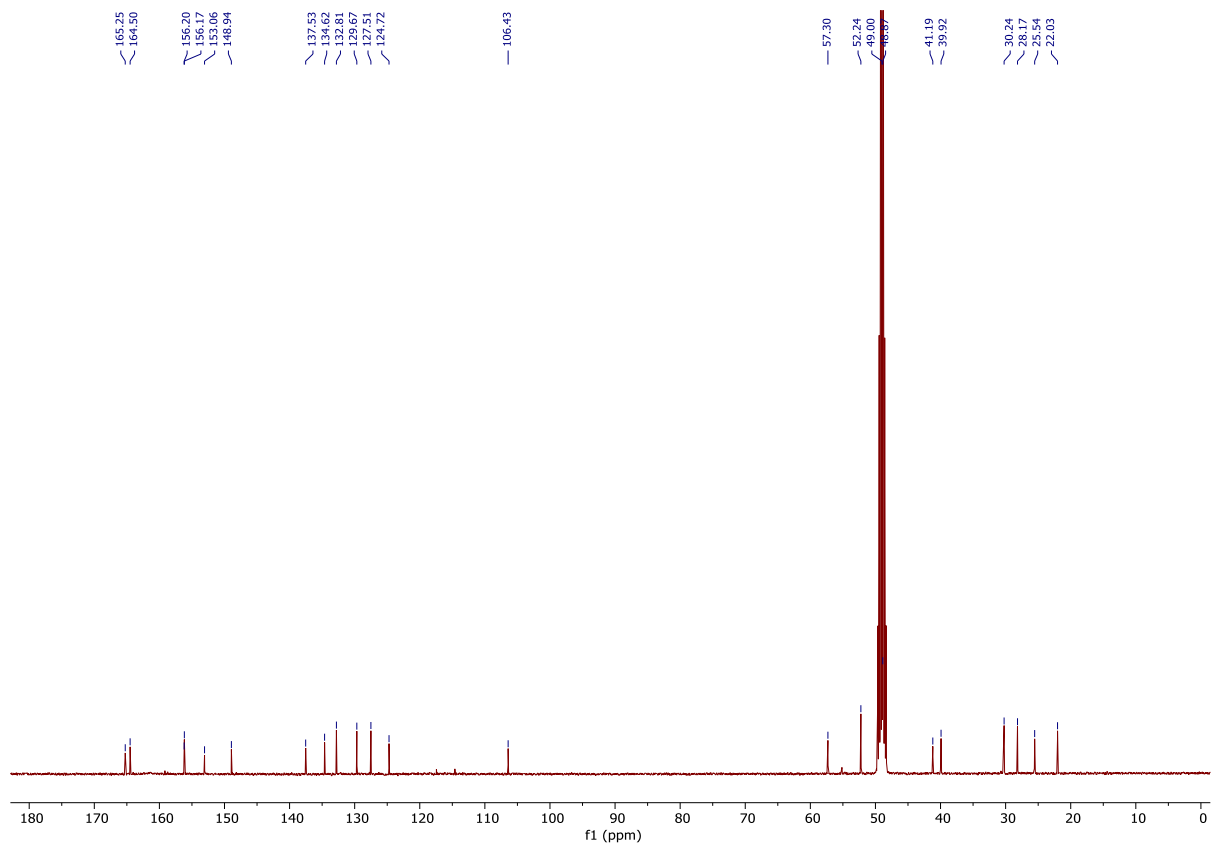

**N-(4-(4-(7-((5-(3,4-dichlorophenyl)-1,3,4-oxadiazol-2-yl)methyl)-1,3-dimethyl-2,6-dioxo-2,3,6,7-tetrahydro-1H-purin-8-yl)piperazin-1-yl)butyl)-3-(5,5-difluoro-7-(1H-pyrrol-2-yl)-5H-5λ<sup>4</sup>,6λ<sup>4</sup>-dipyrrolo[1,2-c:2',1'-f][1,3,2]diazaborinin-3-yl)propenamide, CBH-004 (8)**

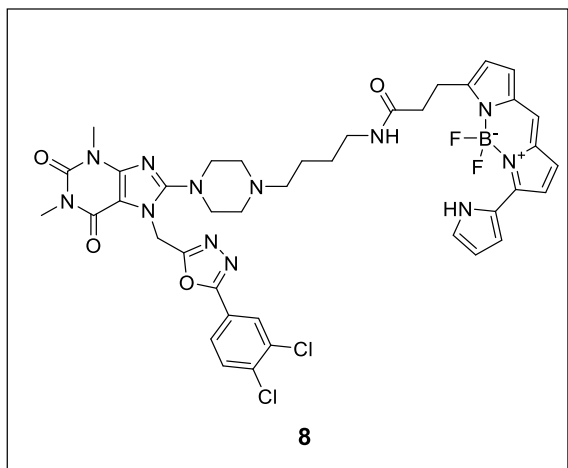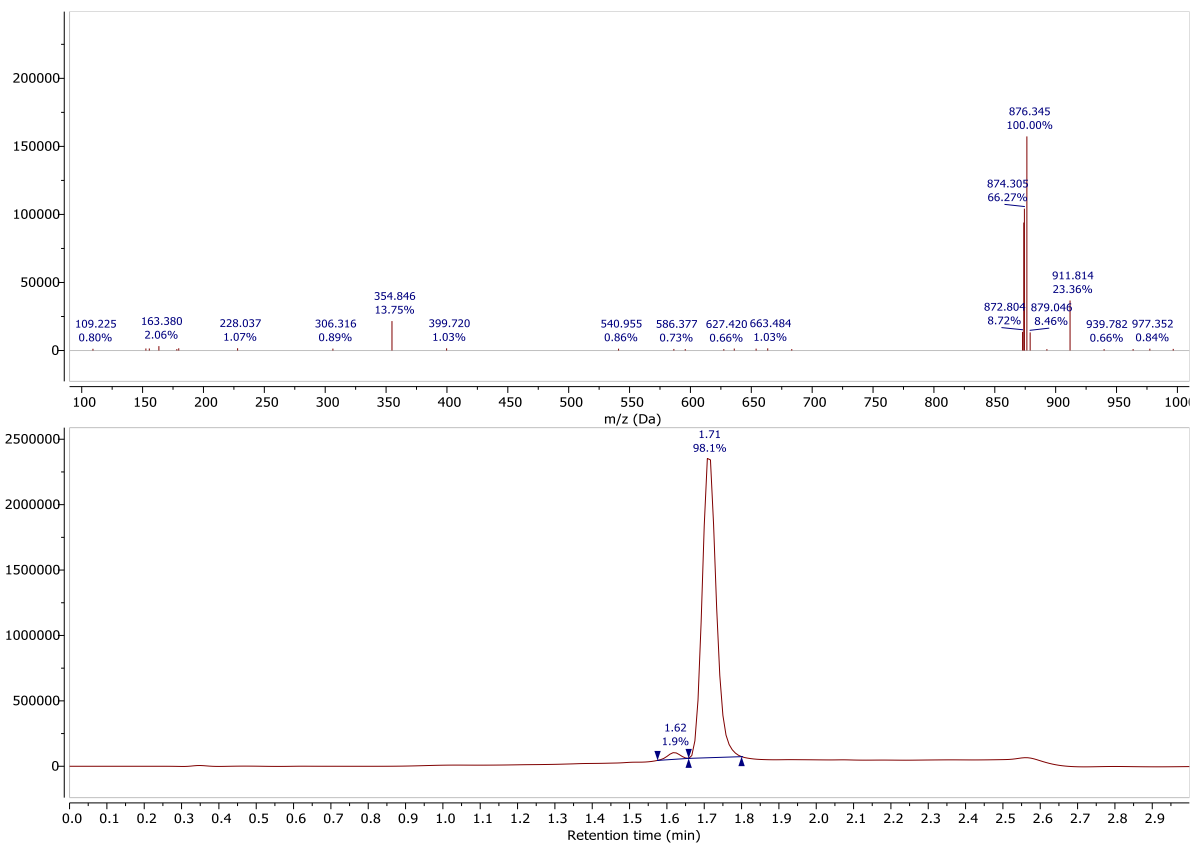

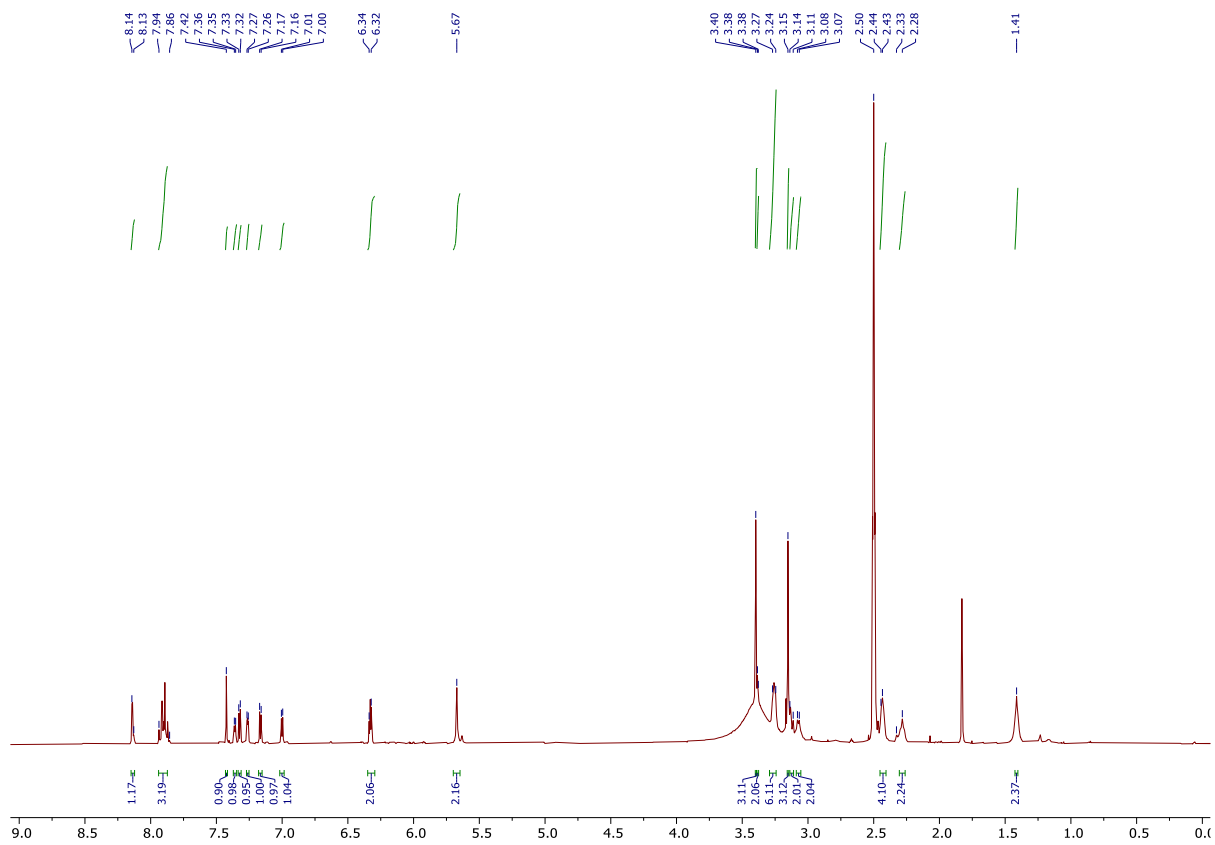

**Table S2.** X-ray data collection and refinement statistics.

| <b>Complex</b>                              | <b>NUDT5-ibrutinib (1)</b> | <b>NUDT5-compound 9</b>     | <b>NUDT14-compound 9</b>                                                        |
|---------------------------------------------|----------------------------|-----------------------------|---------------------------------------------------------------------------------|
| <b>PDB accession codes</b>                  | <b>8RDZ</b>                | <b>8RIY</b>                 | <b>8OTV</b>                                                                     |
| <b>Data collection</b>                      |                            |                             |                                                                                 |
| Resolution range                            | 49.51-2.02 (2.09-2.02)     | 83.77-2.29 (2.65-2.29)      | 54.05-1.82 (1.89-1.82)<br><i>P</i> 2 <sub>1</sub> 2 <sub>1</sub> 2 <sub>1</sub> |
| Space group                                 | <i>P</i> 1                 | <i>P</i> 6 <sub>1</sub> 2 2 | 51.25, 90.97, 108.10                                                            |
| Unit cell a, b, c (Å)                       | 47.71, 59.20, 79.43        | 60.61, 60.61, 502.61        | 90, 90, 90                                                                      |
| Unit cell $\alpha$ , $\beta$ , $\gamma$ (°) | 80.65, 82.96, 77.03        | 90, 90, 120                 | 556659 (38748)                                                                  |
| Total reflections                           | 150478 (15280)             | 329168 (15042)              | 45867 (4293)                                                                    |
| Unique reflections                          | 53078 (5257)               | 9387 (469)                  | 12.1 (9.0)                                                                      |
| Multiplicity                                | 2.8 (2.9)                  | 35.1 (32.1)                 | 98.06 (81.55)                                                                   |
| Completeness (%)                            | 96.87 (95.82)              | 85.8 (85.7) (*)             | 9.60 (0.33)                                                                     |
| Mean <i>I</i> / sigma ( <i>I</i> )          | 7.35 (1.25)                | 10.3 (1.8)                  | 0.127 (2.80)                                                                    |
| R-merge                                     | 0.057 (0.875)              | 0.335 (2.54)                | 0.999 (0.382)                                                                   |
| CC(1/2)                                     | 0.994 (0.243)              | 0.999 (0.835)               |                                                                                 |
| <b>Refinement</b>                           |                            |                             |                                                                                 |
| R-work                                      | 0.226 (0.346)              | 0.229 (0.282)               | 0.206 (0.418)                                                                   |
| R-free                                      | 0.285 (0.382)              | 0.295 (n/a)                 | 0.239 (0.443)                                                                   |
| R.M.S.D. bonds (Å)                          | 0.462                      | 0.005                       | 0.005                                                                           |
| R.M.S.D. angles (°)                         | 5.84                       | 1.37                        | 0.76                                                                            |
| <b>Molprobrity Analysis</b>                 |                            |                             |                                                                                 |
| Ramachandran favoured (%)                   | 94.63                      | 94.72                       | 96.85                                                                           |
| Ramachandran allowed (%)                    | 4.43                       | 5.28                        | 2.91                                                                            |
| Ramachandran outliers (%)                   | 0.94                       | 0                           | 0.24                                                                            |
| Rotamers outliers (%)                       | 3.56                       | 3.91                        | 0.29                                                                            |
| Average B-factor                            | 46.65                      | 48.6                        | 45.27                                                                           |
| Macromolecules                              | 46.27                      | 48.8                        | 45.18                                                                           |
| Ligands                                     | 66.54                      | 46.2                        | 44.41                                                                           |
| solvent                                     | 37.45                      | 32.0                        | 46.82                                                                           |

Statistics for the highest-resolution shell are shown in parentheses.

(\*) Ellipsoid completeness from Staraniso

**Table S3.** Primers for cloning.

| <b>Primers</b> | <b>Sequence</b>                            |
|----------------|--------------------------------------------|
| NUDT5 forward  | TACTTCCAATCCATGGAGAGCCAAGAACCAACGG         |
| NUDT5 reverse  | TATCCACCTTTACTGTCAATTTGCATGTTTCAGTGCTAGAGC |
| NUDT14 forward | TACTTCCAATCCATGGAGCGCATCGAGGGGGC           |
| NUDT14 reverse | TATCCACCTTTACTGTCACTGGAGATCCAGGTTGGG       |
